# Supplementary material for: Karyotypic stasis and swarming influenced the evolution of viral tolerance in a species-rich bat radiation
Source: PubMed Central journal article supplement — Cell Genom. 2024 Jan 17;4(2):100482. doi: 10.1016/j.xgen.2023.100482 (PMC10879000; doi:10.1016/j.xgen.2023.100482), 2024-01-17
Supplement: mmc1.pdf [file mmc1.pdf]

**Cell Genomics, Volume 4**

## **Supplemental information**

**Karyotypic stasis and swarming**

**influenced the evolution of viral tolerance**

**in a species-rich bat radiation**

**Nicole M. Foley, Andrew J. Harris, Kevin R. Bredemeyer, Manuel Ruedi, Sebastien J. Puechmaille, Emma C. Teeling, Michael F. Criscitiello, and William J. Murphy**

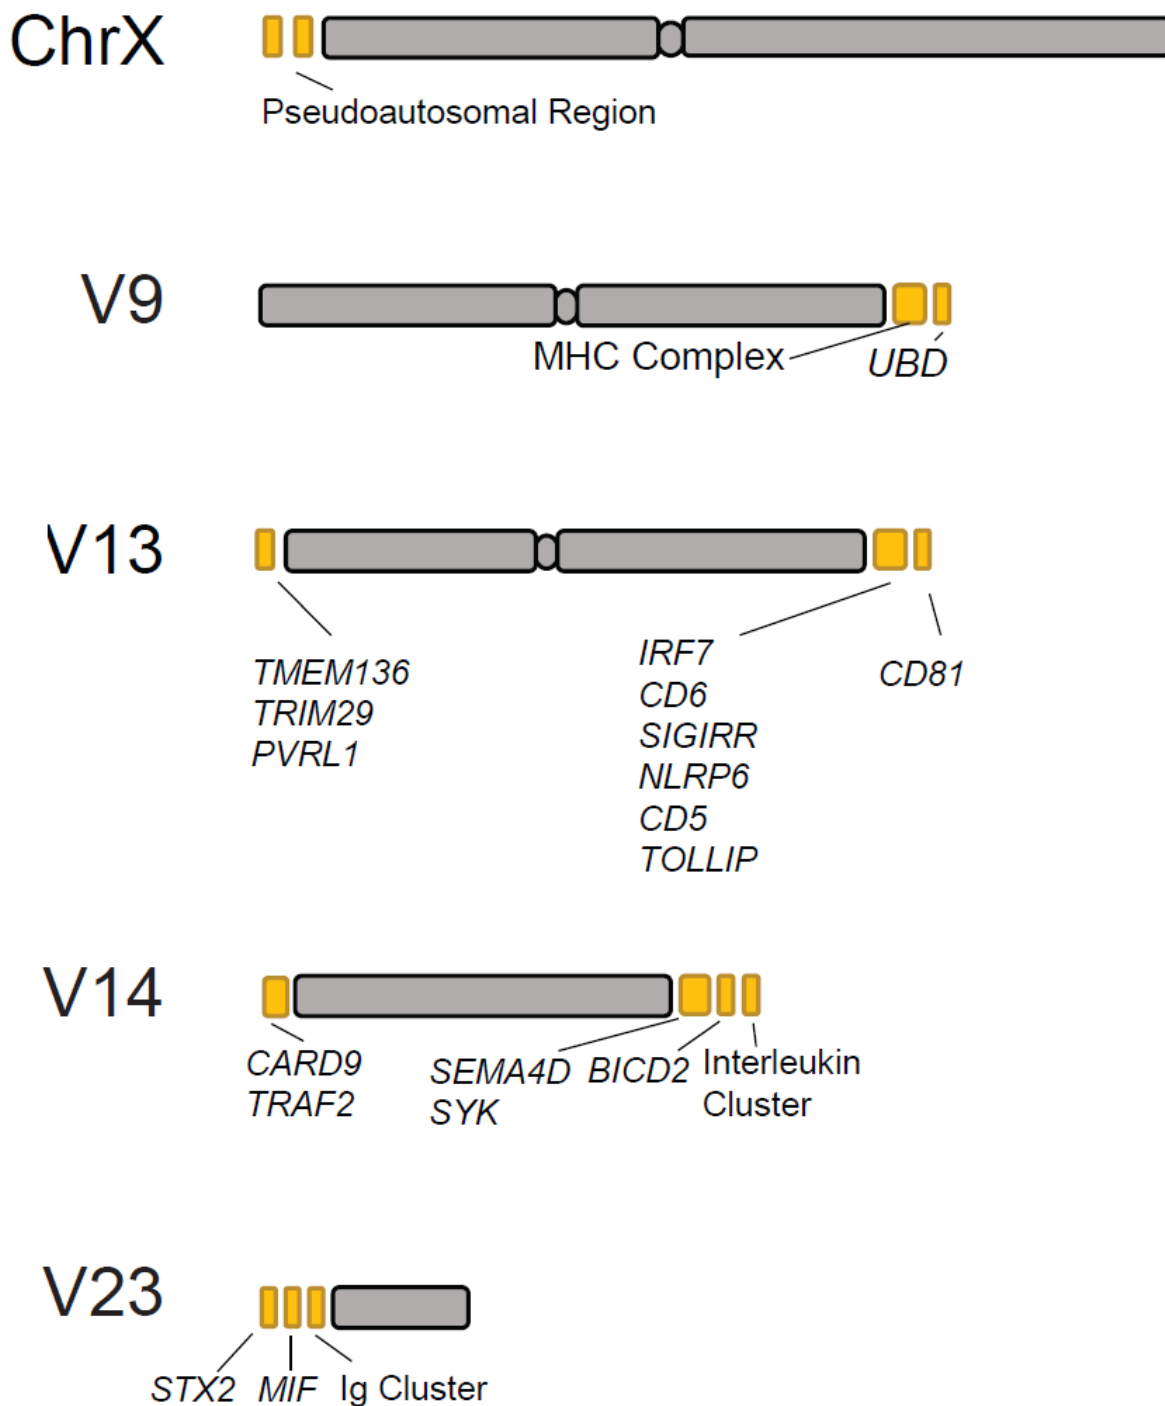

**Figure S1: Previously unplaced assembly scaffolds contained many immune-related genes, related to the improved *Myotis myotis* genome assembly analyzed in Figure 2.** Gray blocks depict the original chromosome-scale scaffolds from the original assembly (GCA\_014108235.1). Yellow blocks represent unplaced scaffolds currently assigned to chromosomes. The yellow blocks are not drawn to scale.

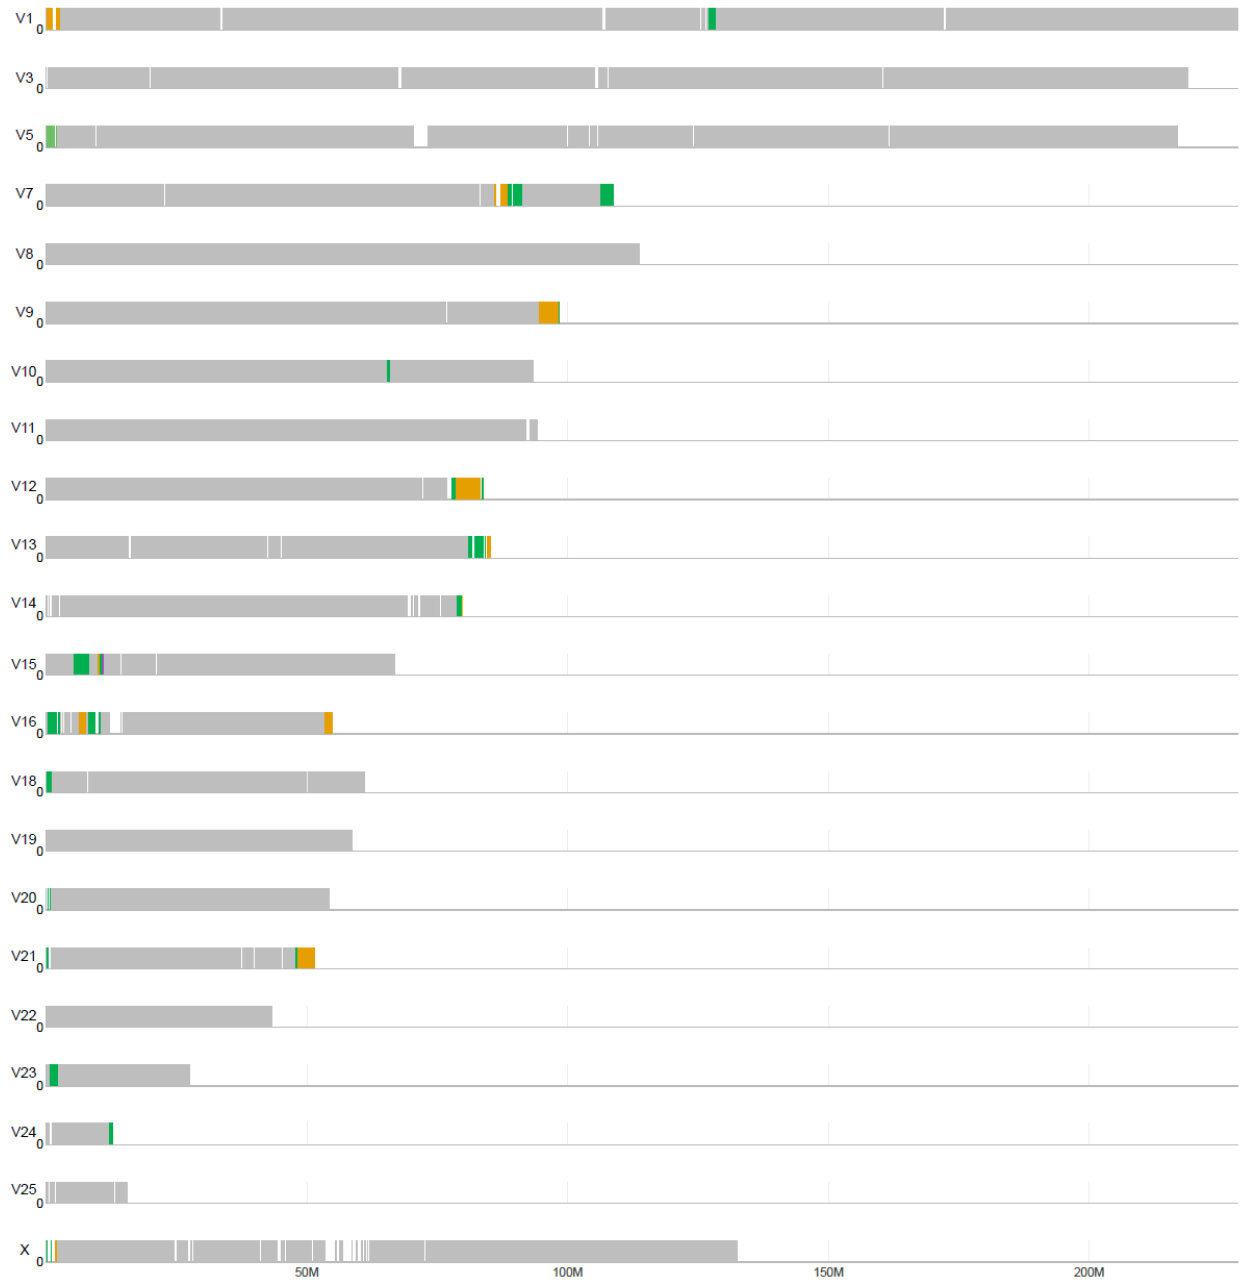

**Figure S2: Most unplaced scaffolds were added to the terminal ends of chromosomes, related to the improved *Myotis myotis* genome analyzed in Figure 2.** Portions of chromosomes colored gray represents the chromosome level scaffolds from the original assembly [S1]. Green and orange blocks, alternated to highlight where multiple scaffolds were added to the same region, illustrate where previously unplaced scaffolds were positioned in the new assembly based on Hi-C analysis and visualization in JBAT. All blocks and chromosomes are shown to scale. White spaces in blocks correspond to regions that were unassembled or removed due to missing data or poor alignment quality in the sliding window analysis.

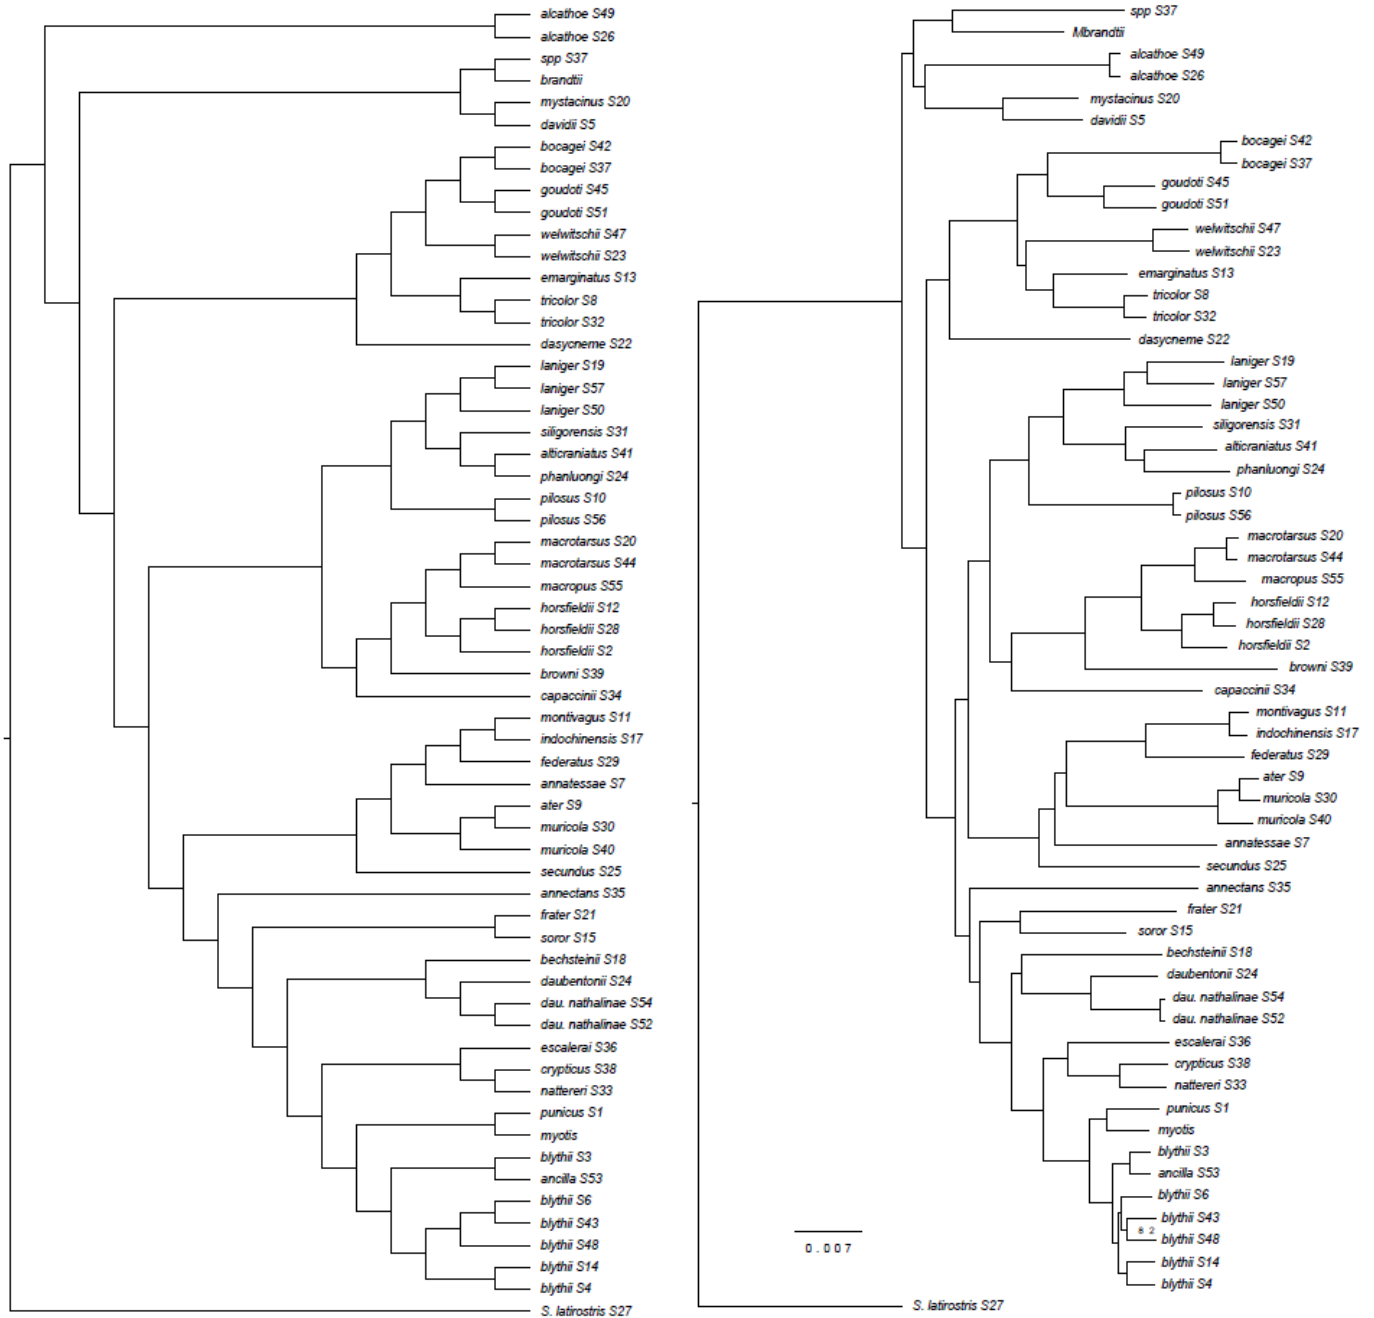

**Figure S3: Whole genome nuclear topologies with all 60 individuals, related to Figure 1.** The tree on the left is the 50% Majority Rule tree derived from the SVDquartets analysis. The rightmost tree is the IQtree2 Maximum Likelihood with branch lengths. All bootstrap supports are 100 unless otherwise indicated.

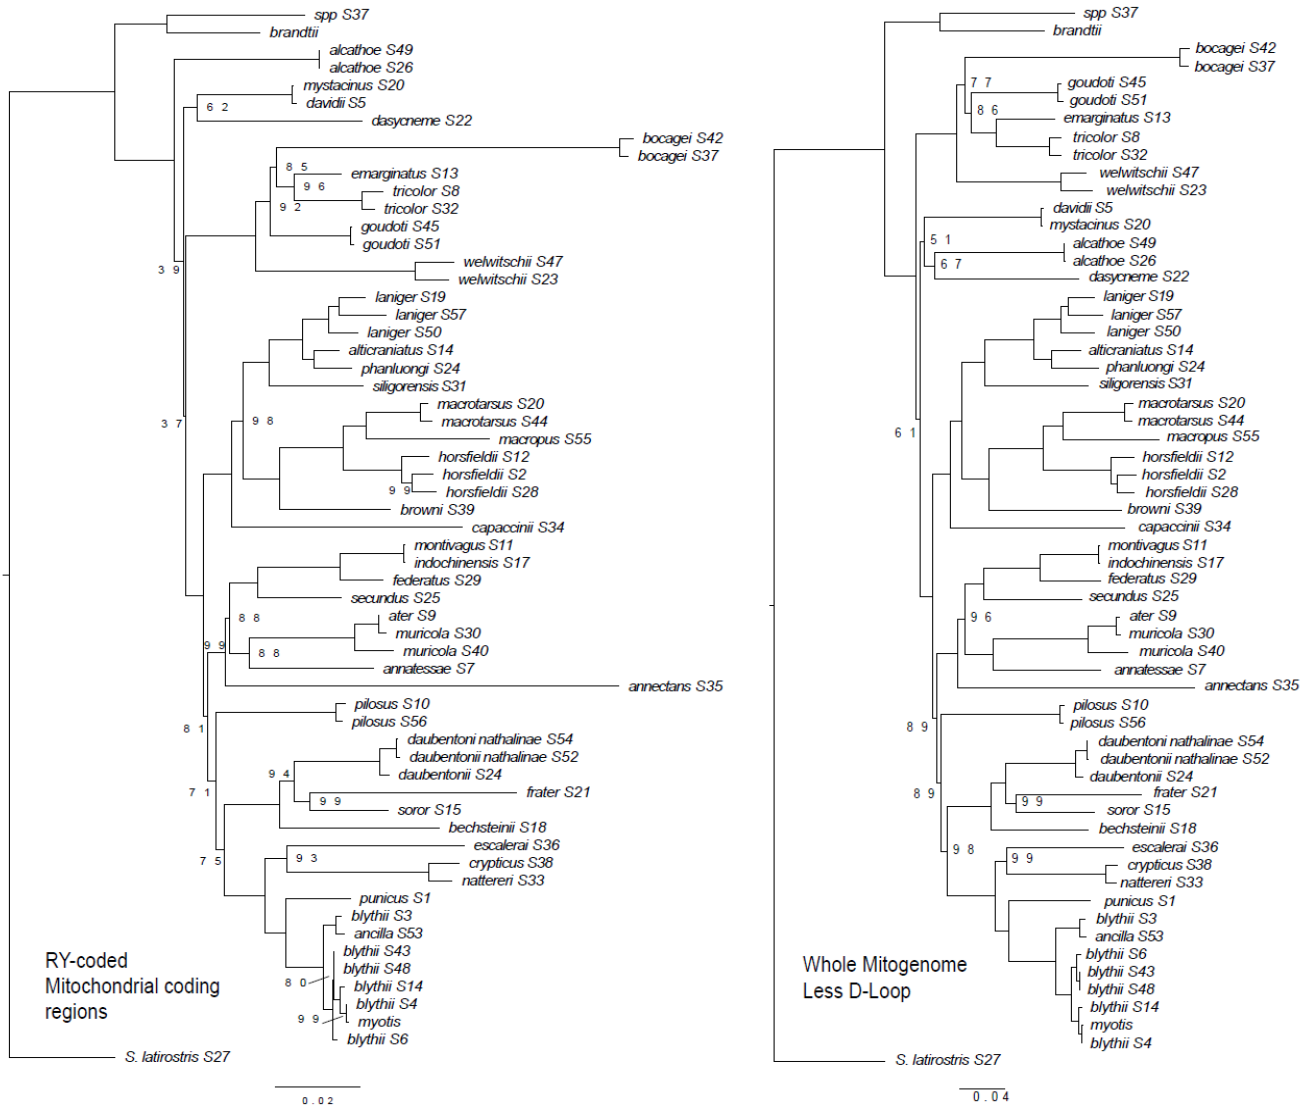

**Figure S4: Mitogenome topologies with all 60 individuals, related to Figure 1.** The tree on the left is RY-coded dataset. The tree on the right is the whole mitogenome with the D-Loop removed. All bootstrap supports are 100 unless otherwise indicated.

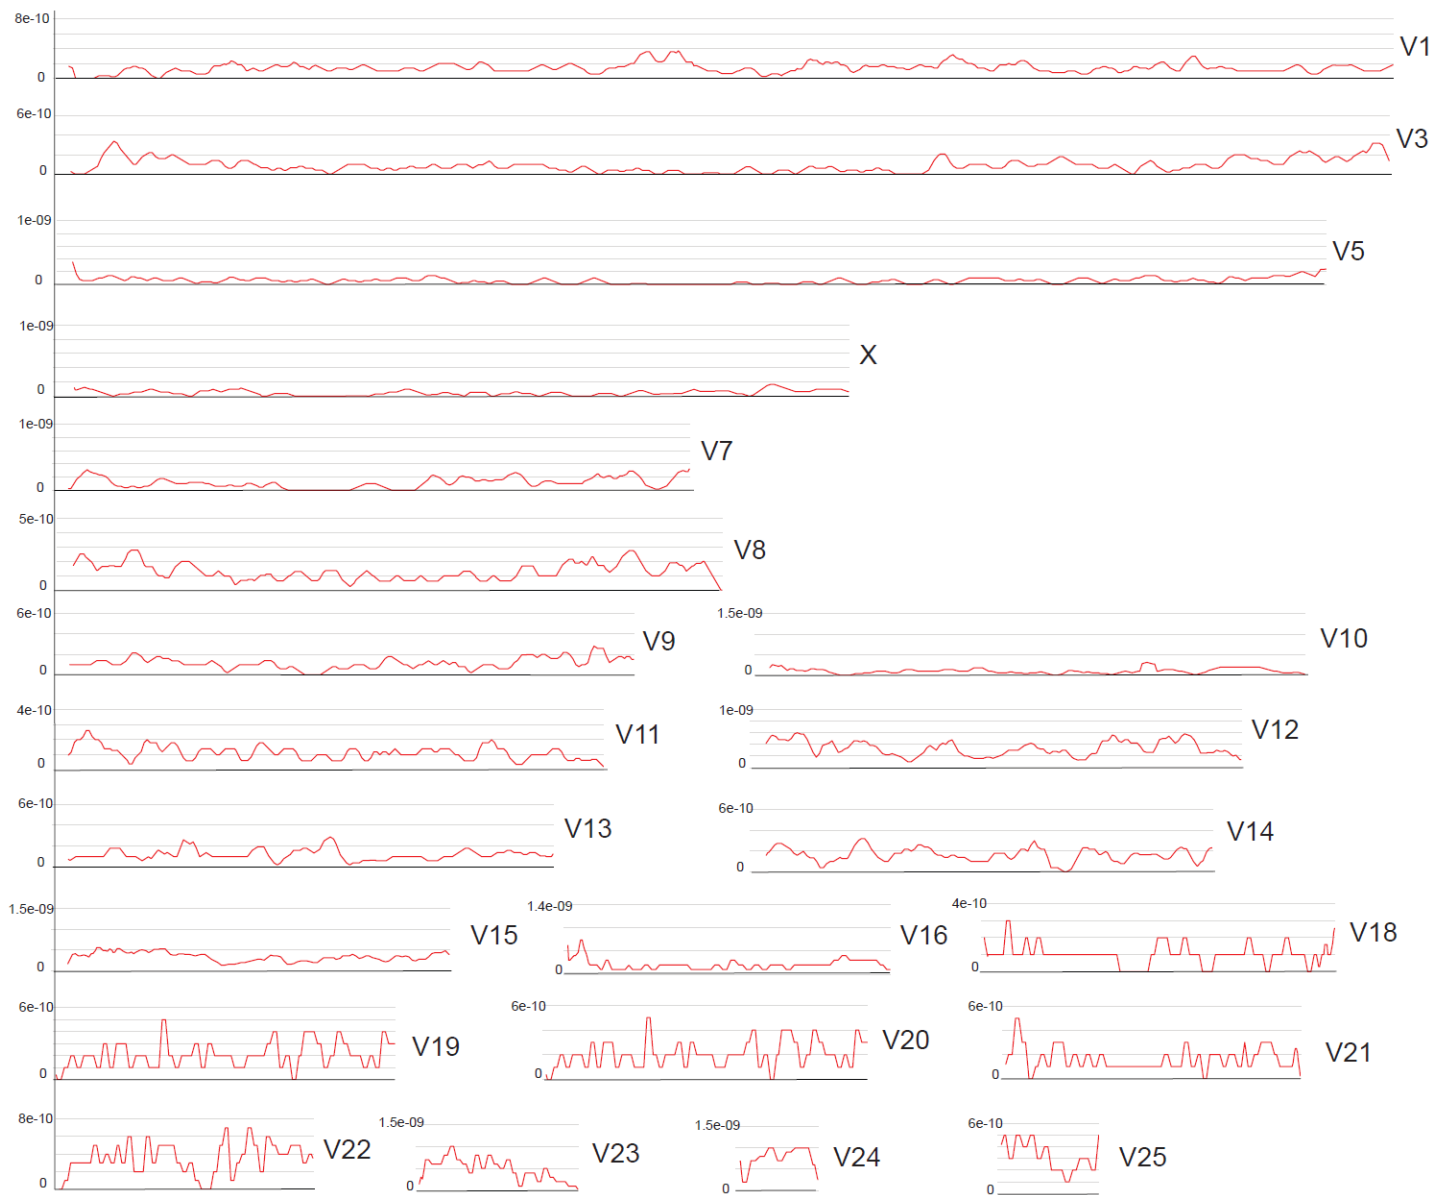

**Figure S5.**

***Myotis myotis* recombination map, related to Figure 2.** Genome-wide distribution of recombination rates inferred using ReLERNN. Rates are averaged every 2Mb in 50kb sliding windows. For illustrative purposes V1-V15 and chrX are displayed using a sliding average with a step of 50. Chromosomes V16-V25 are displayed using a sliding average with a step of 10.

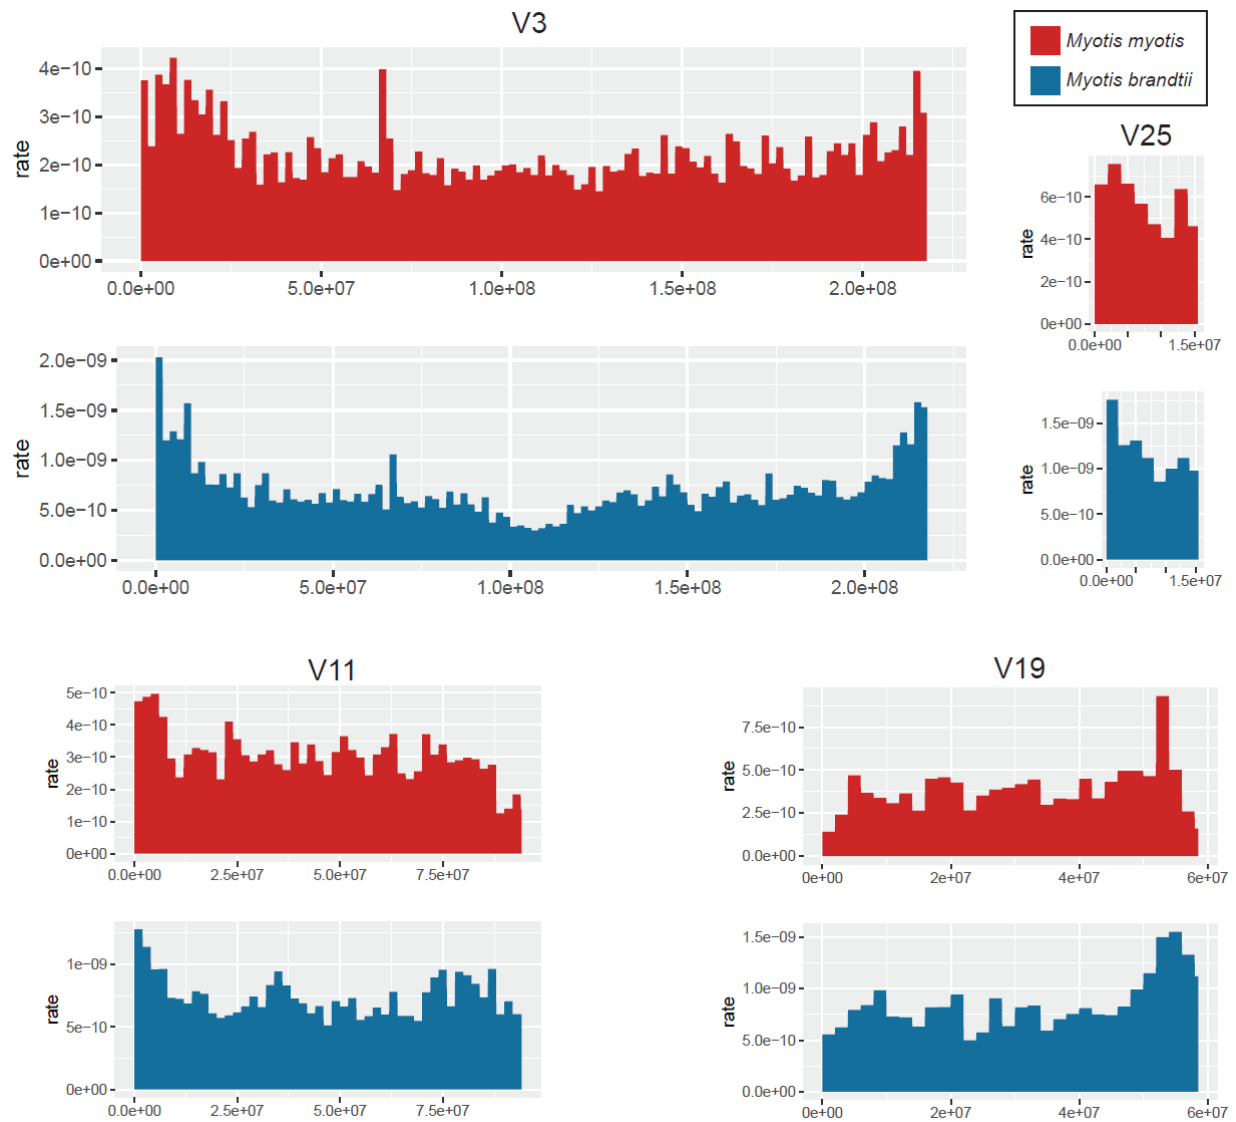

**Figure S6: Comparison of select chromosomes from *M. myotis* and *M. brandtii* recombination maps, related to Figure 2.**

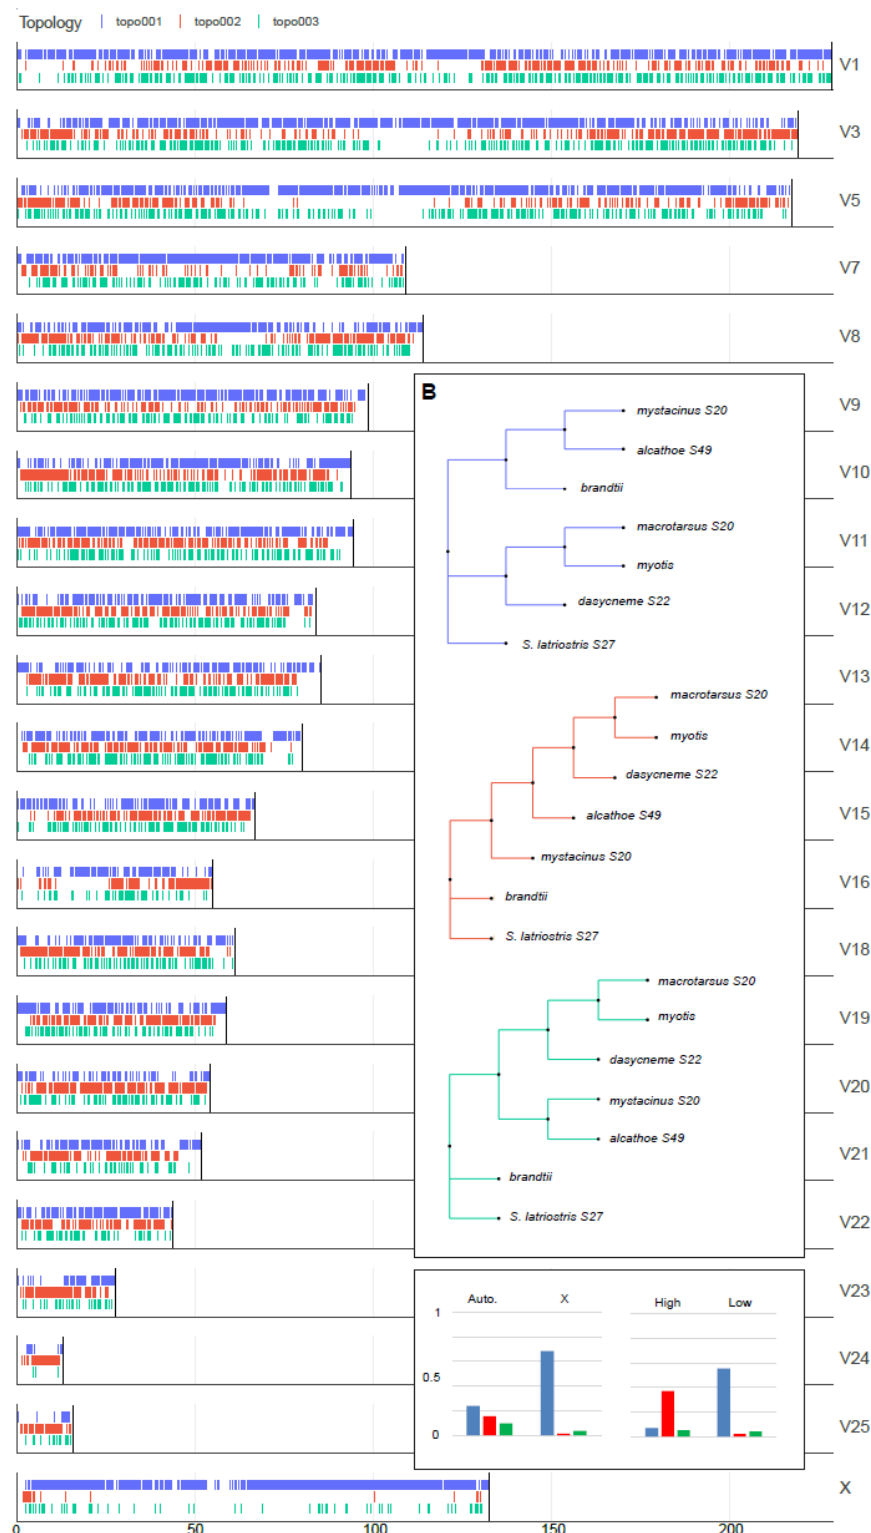

**Figure S7: Genome-wide phylogenomic signal to determine the position of the whiskered bat clade, related to Figure 3. A) Genome-wide distribution of topologies shown in B). C) shows the frequency of each topology on the autosomes and X and in high and low recombining regions.**

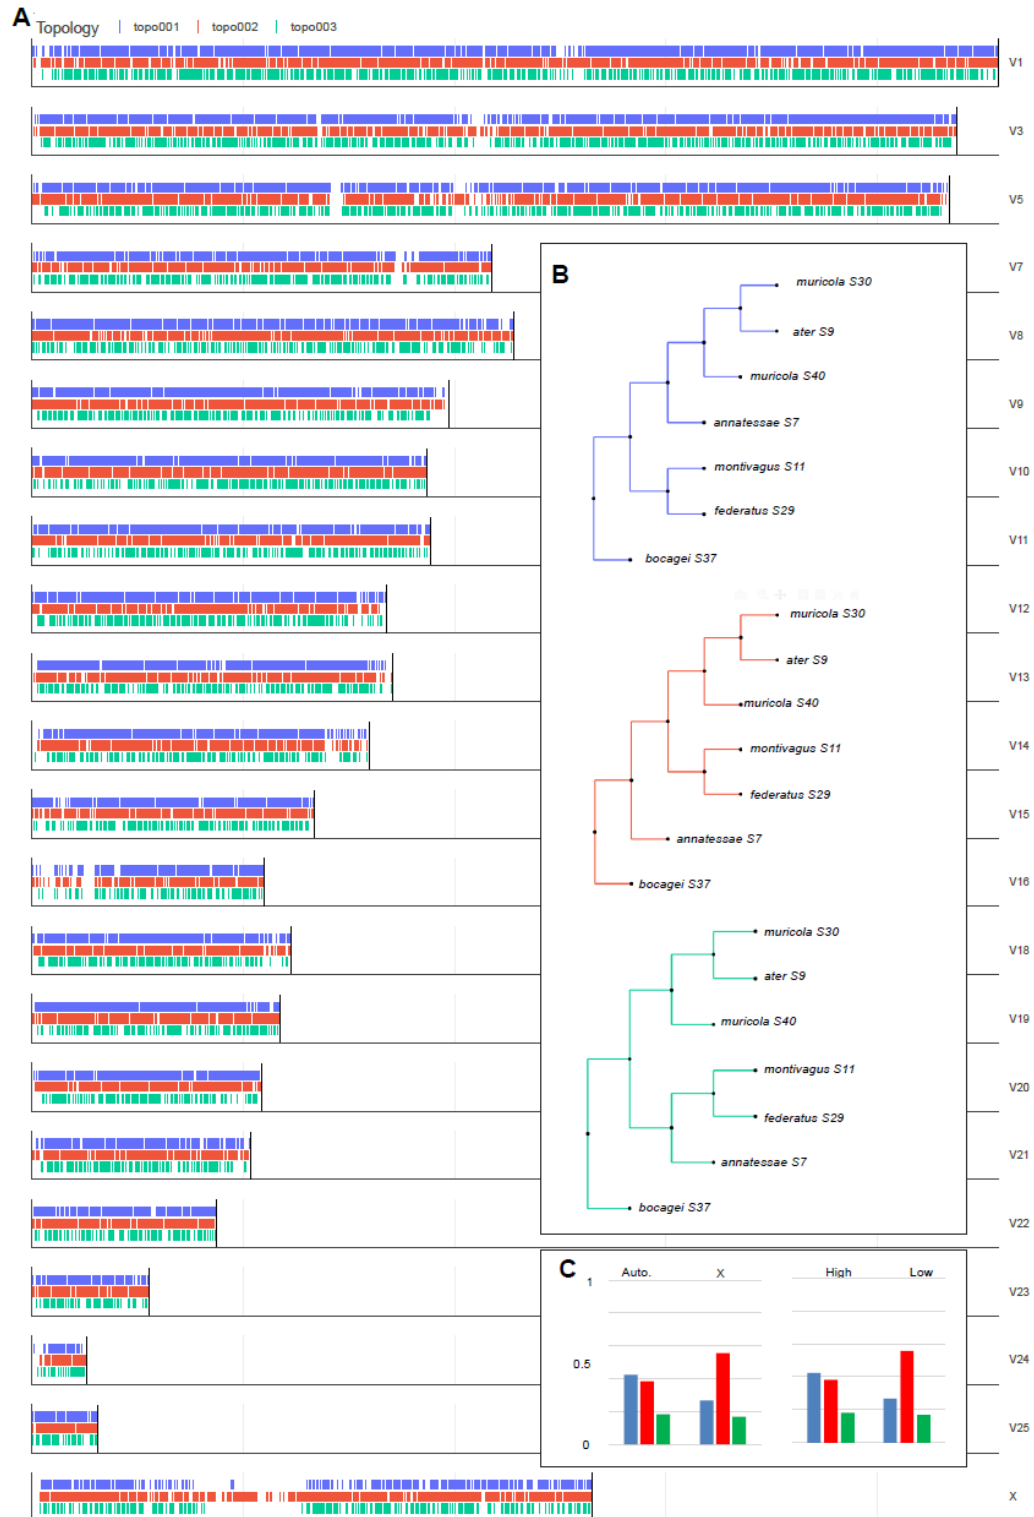

**Figure S8: Genome-wide phylogenomic signal to determine the position of *M. annatessae*, related to Figure 3.** A) Genome-wide distribution of topologies shown in B). C) shows the frequency of each topology on the autosomes and X and in high and low recombining regions.

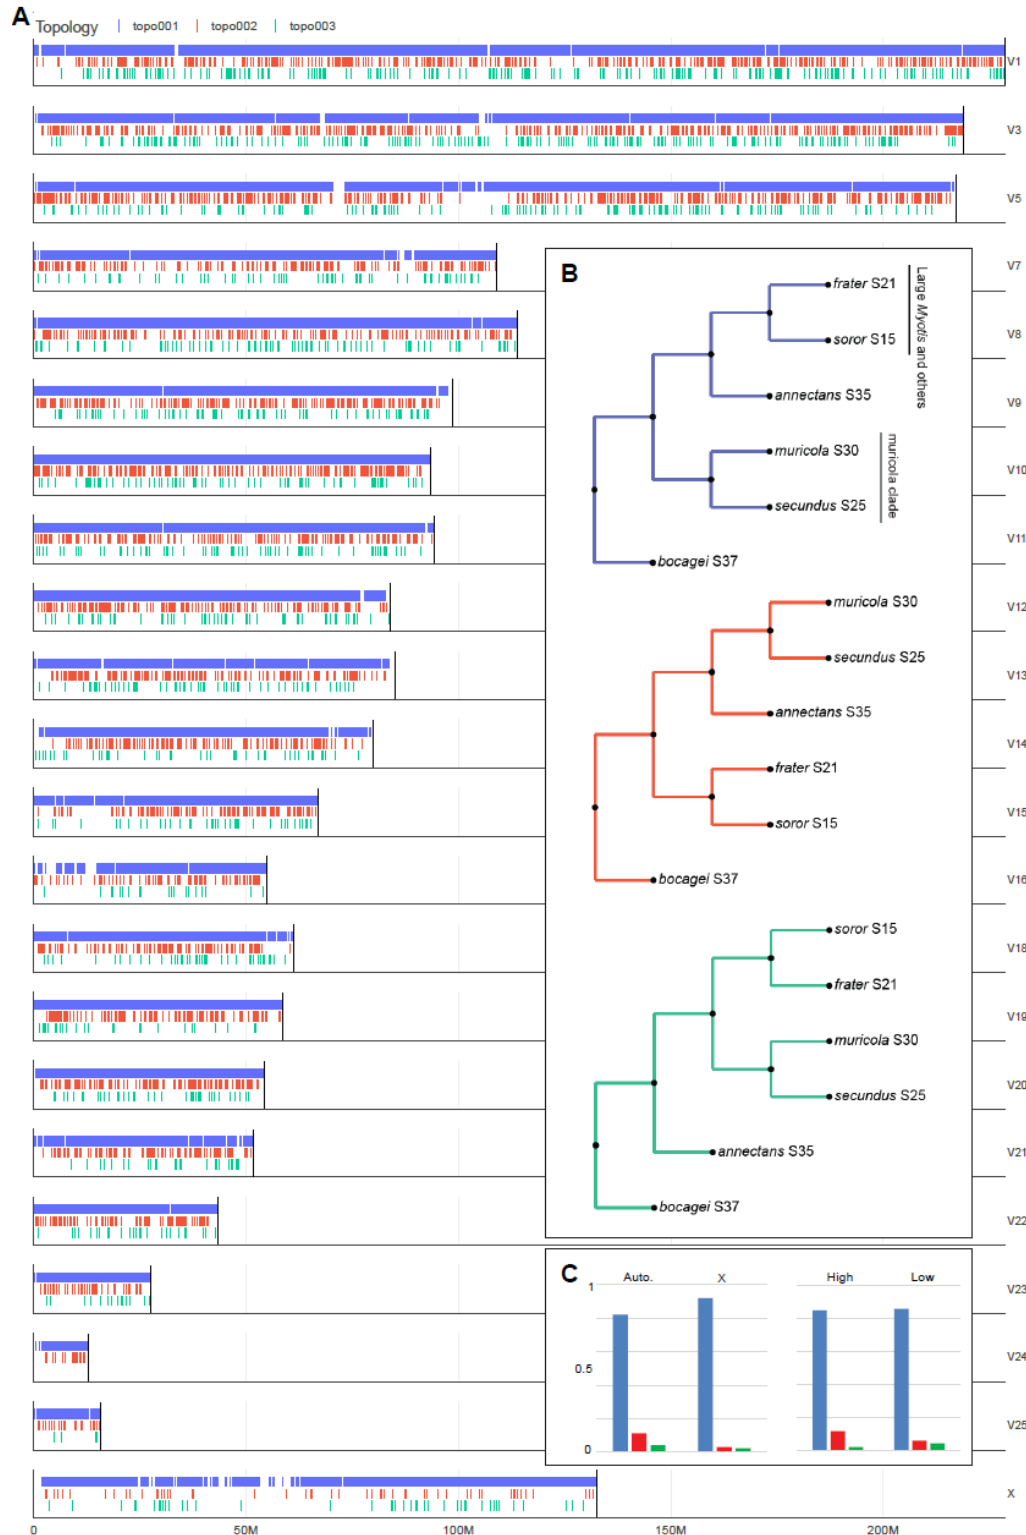

**Figure S9: Genome-wide phylogenomic signal to determine the position of *M. annectans*, related to Figure 3.** A) Genome-wide distribution of topologies shown in B). C) shows the frequency of each topology on the autosomes and X and in high and low recombining regions.

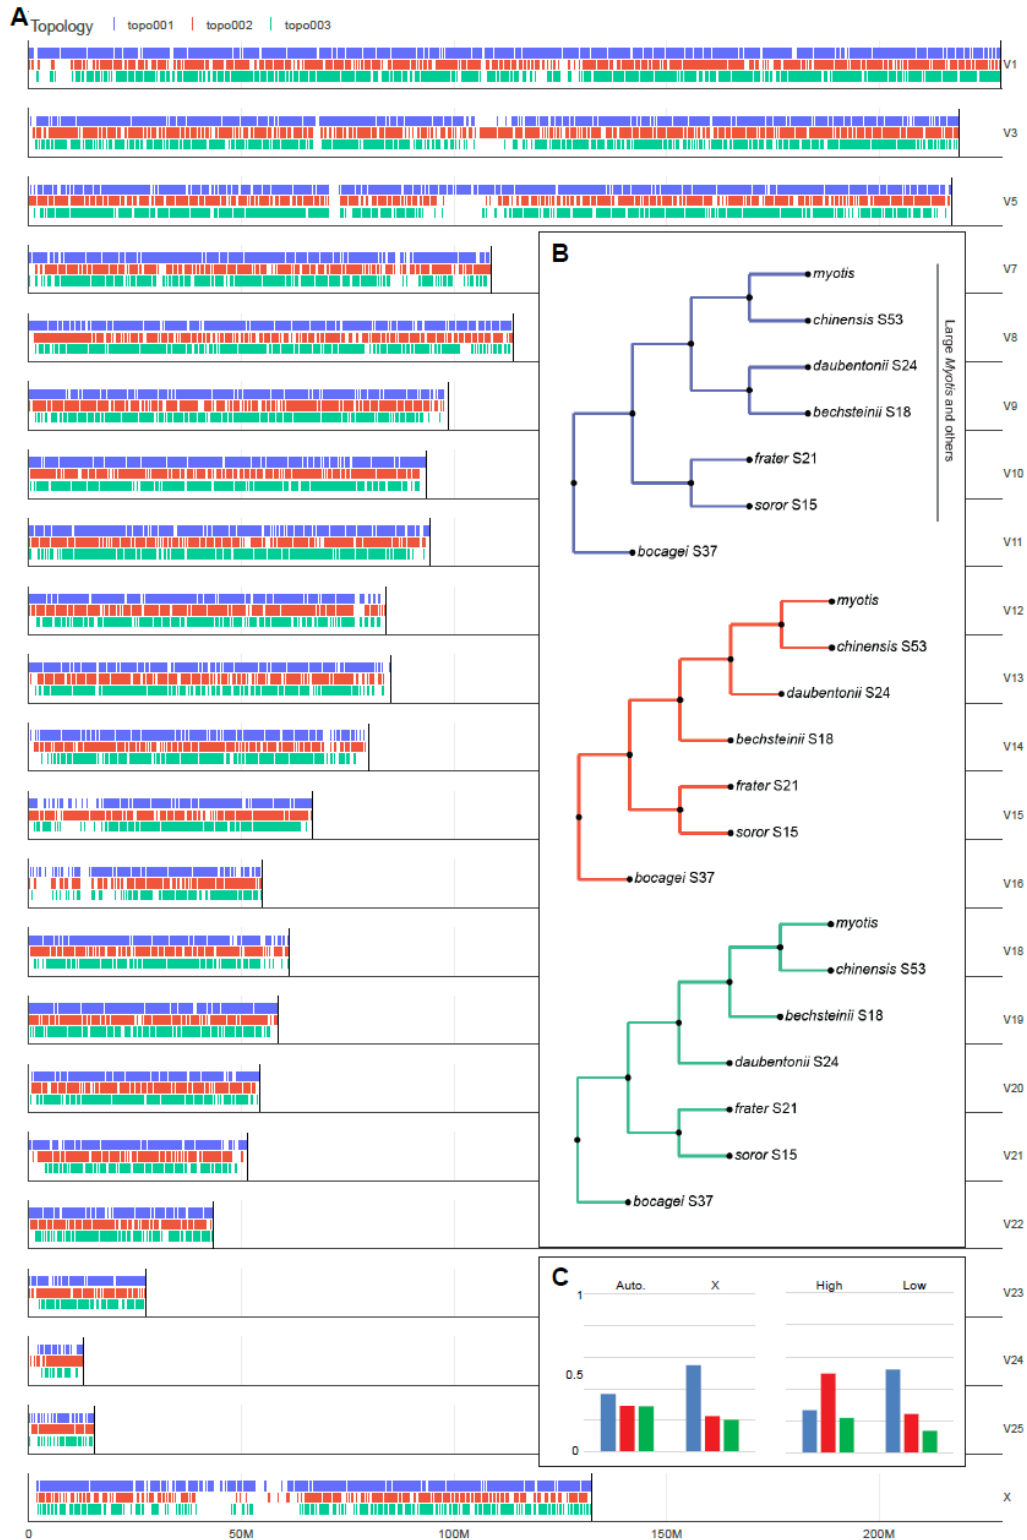

**Figure S10: Genome-wide phylogenomic signal to determine the position of *M. bechsteinii*, related to Figure 3.** A) Genome-wide distribution of topologies shown in B). C) shows the frequency of each topology on the autosomes and X and in high and low recombining regions.

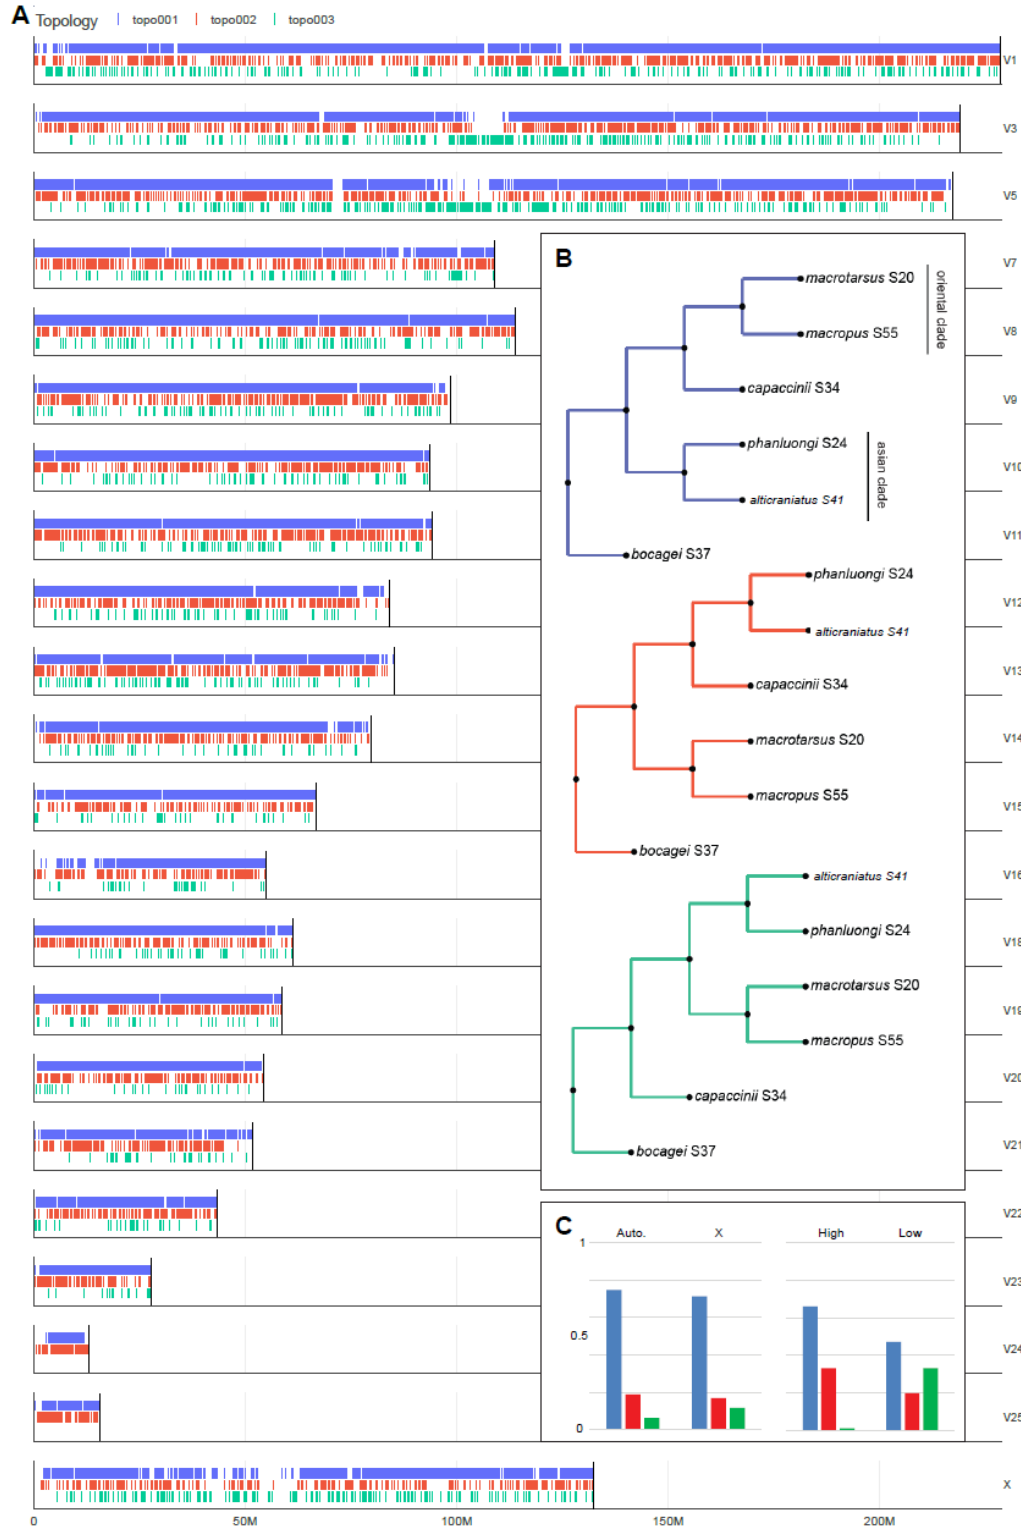

**Figure S11: Genome-wide phylogenomic signal to determine the position of *M. capaccinii*, related to Figure 3. A) Genome-wide distribution of topologies shown in B). C) shows the frequency of each topology on the autosomes and X and in high and low recombining regions.**

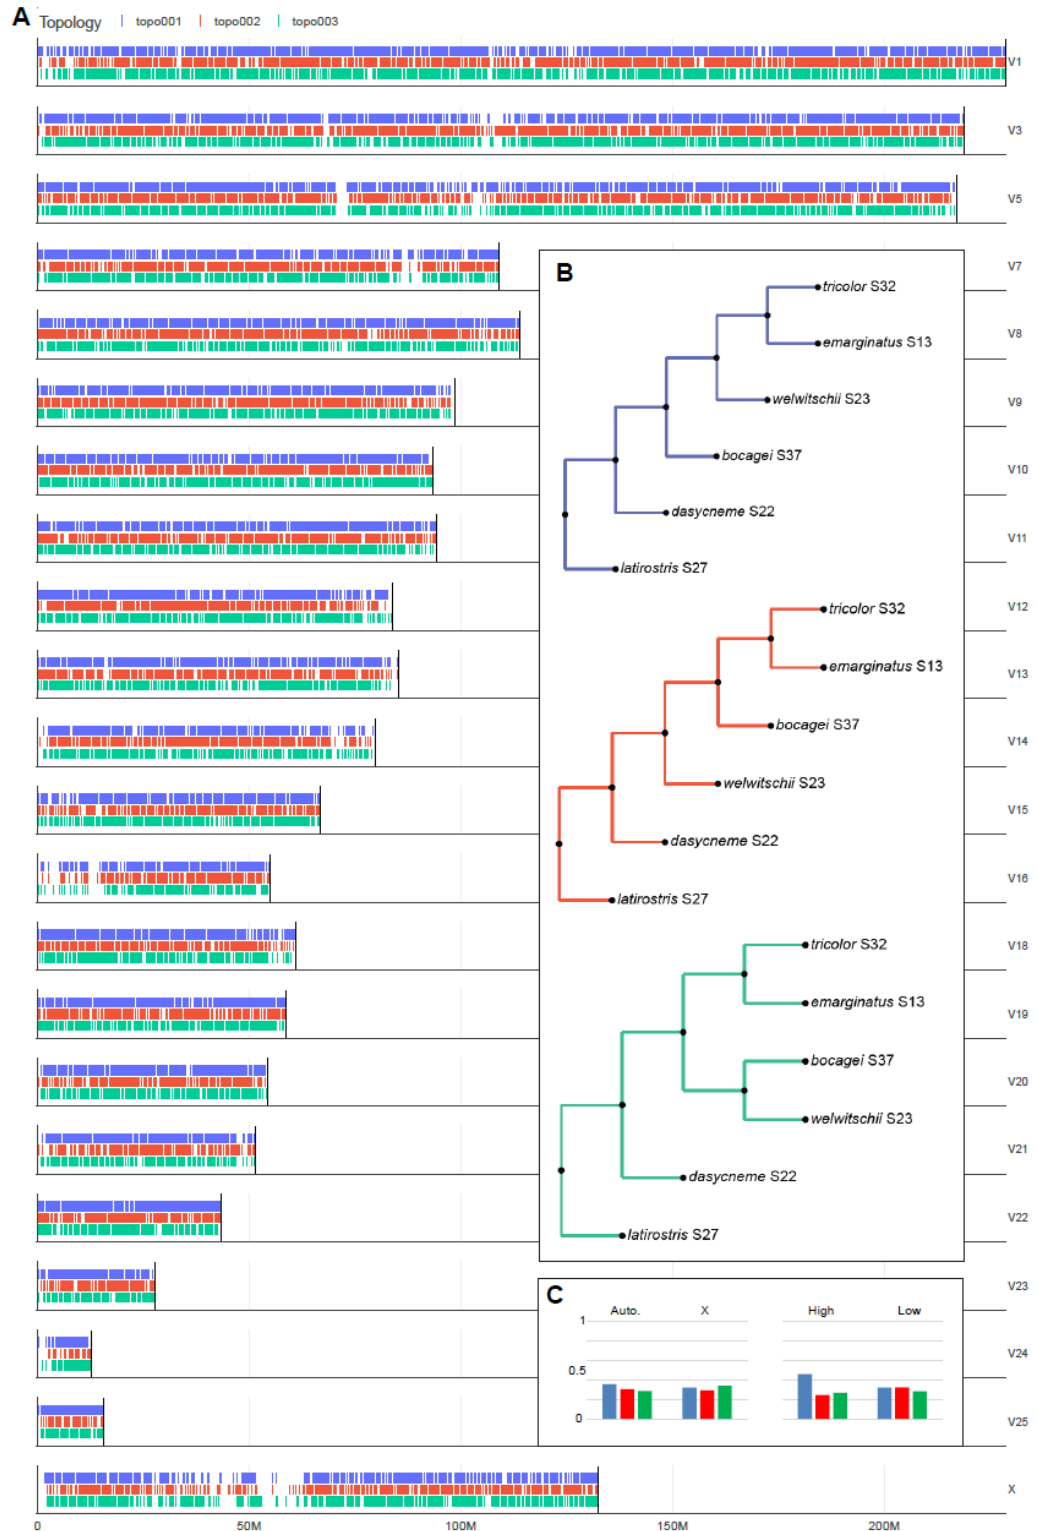

**Figure S12: Genome-wide phylogenomic signal to determine the relationships among species in the Ethiopian clade, related to Figure 3.** A) Genome-wide distribution of topologies shown in B). C) shows the frequency of each topology on the autosomes and X and in high and low recombining regions.

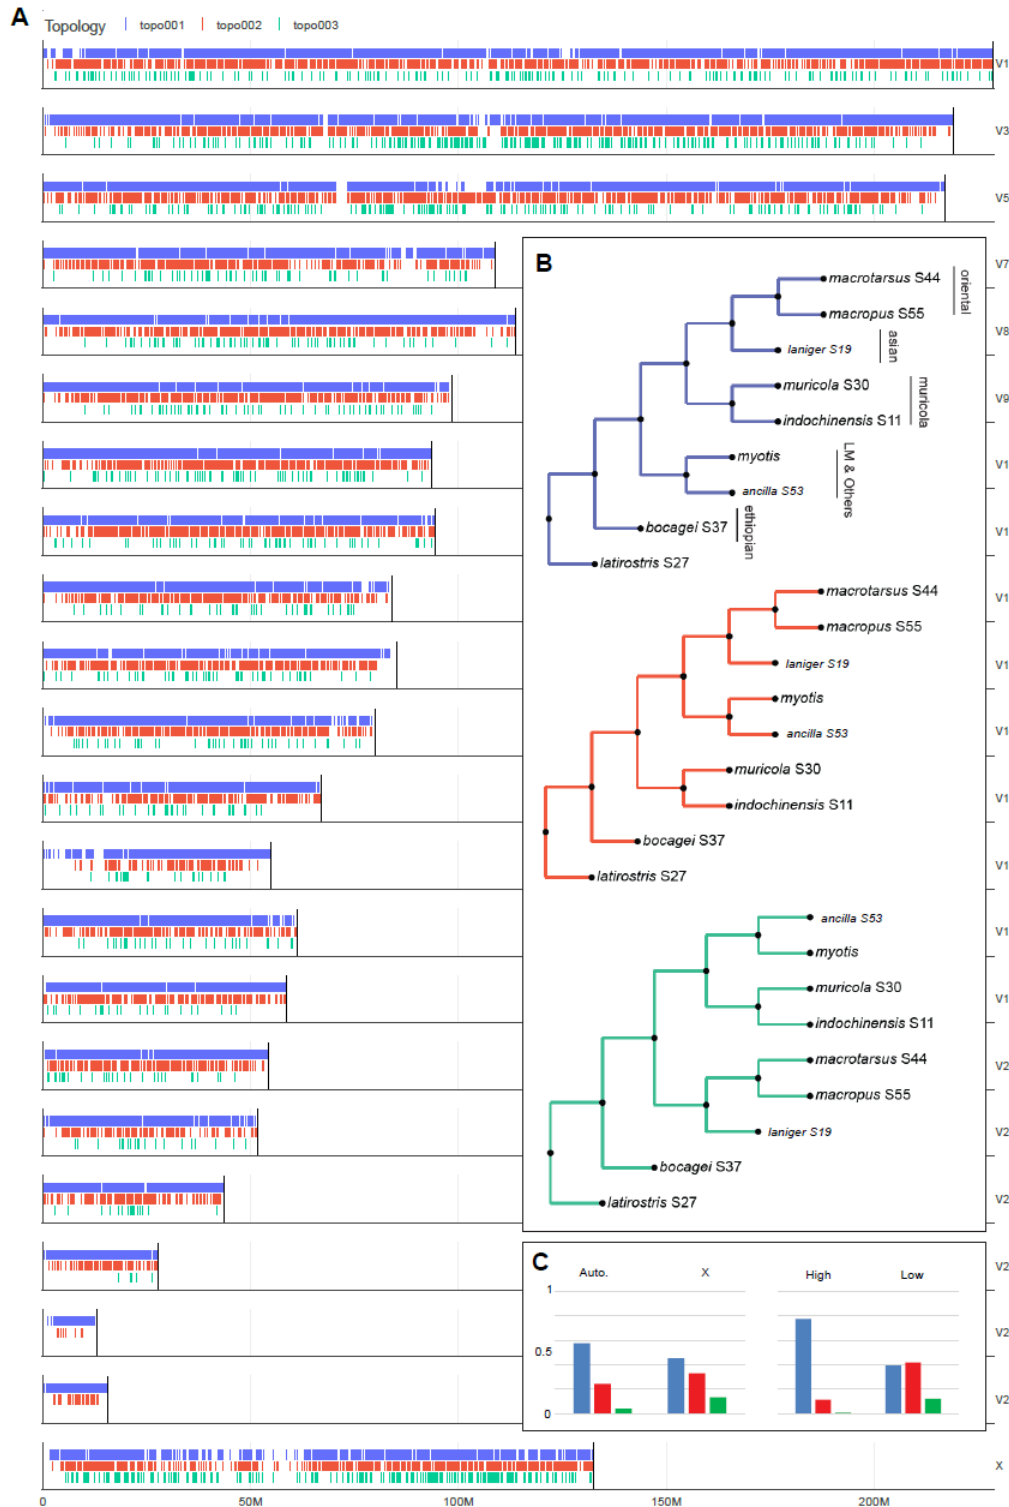

**Figure S13: Genome-wide phylogenomic signal to determine the relationships among the major Old World Clades, related to Figure 3.** A) Genome-wide distribution of topologies shown in B). C) shows the frequency of each topology on the autosomes and X and in high and low recombining regions.

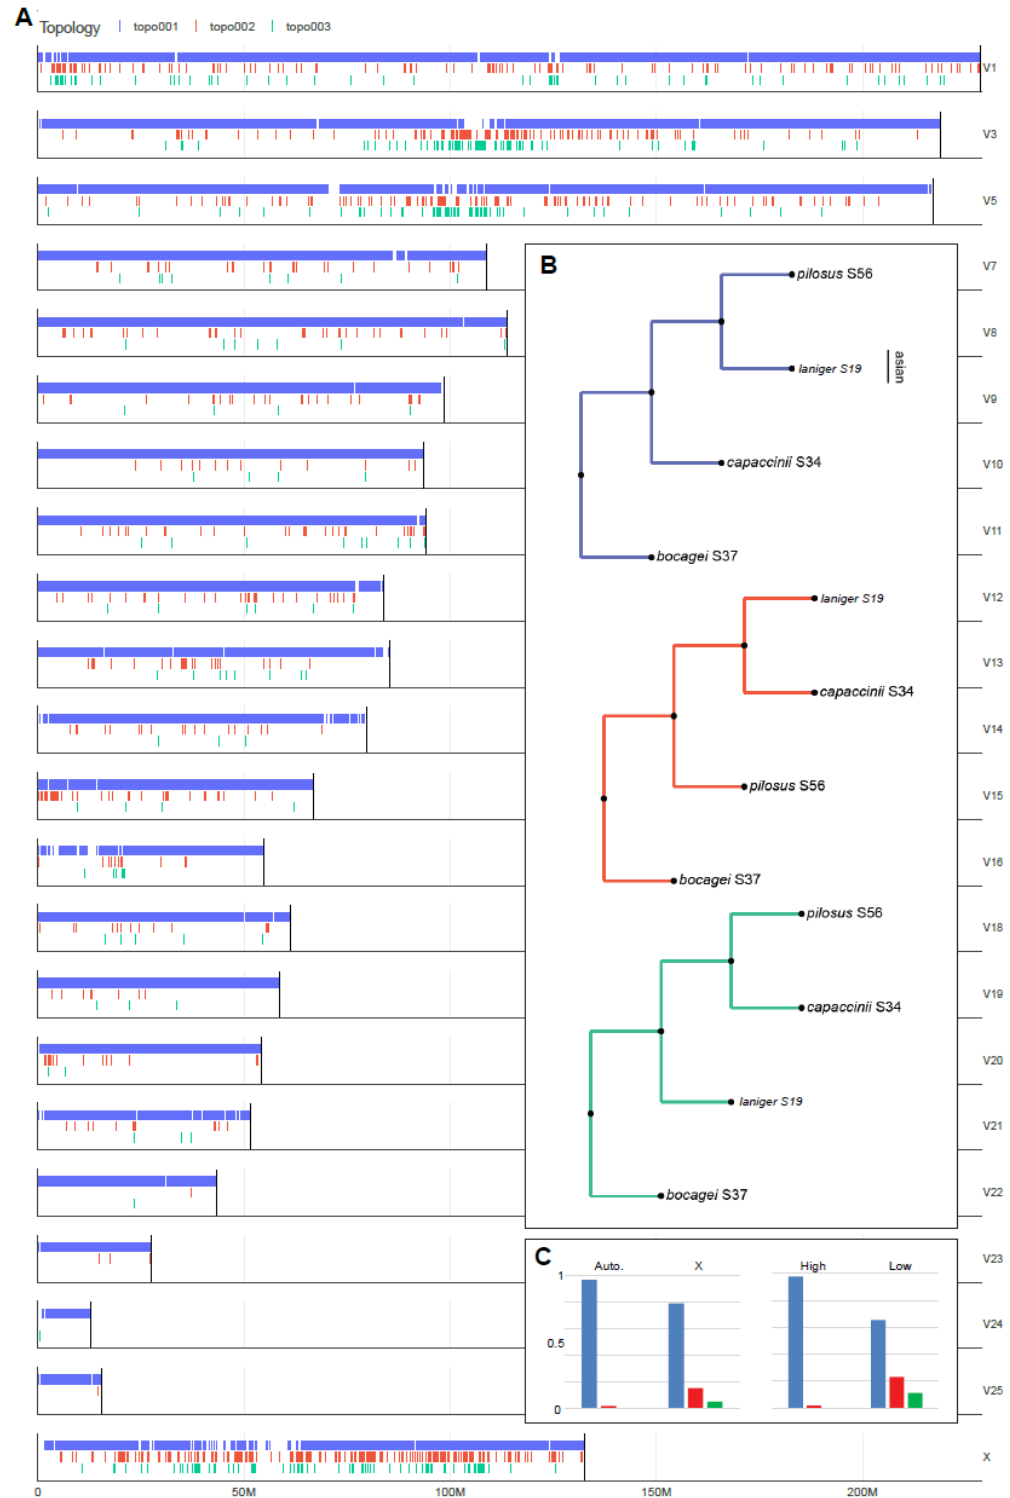

**Figure S14: Genome-wide phylogenomic signal to determine the relationship between *M. pilosus*, *M. capaccinii* and *M. laniger*, related to Figure 3.** A) Genome-wide distribution of topologies shown in B). C) shows the frequency of each topology on the autosomes and X and in high and low recombining regions.

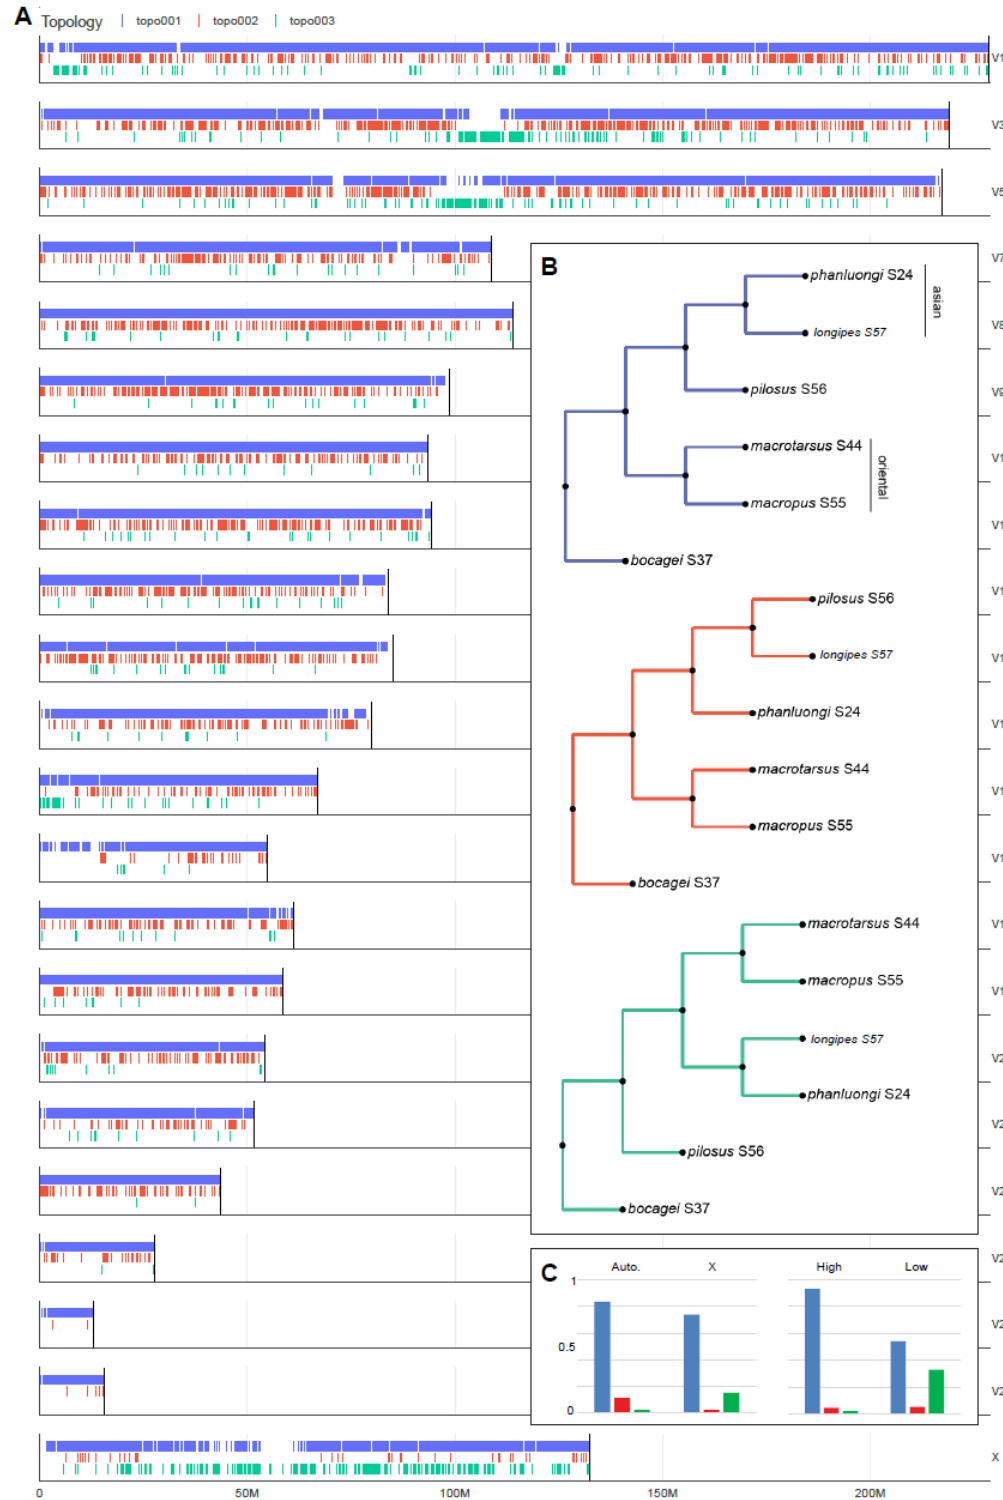

**Figure S15: Genome-wide phylogenomic signal to determine the position of *M. pilosus*, related to Figure 3.** A) Genome-wide distribution of topologies shown in B). C) shows the frequency of each topology on the autosomes and X and in high and low recombining regions.

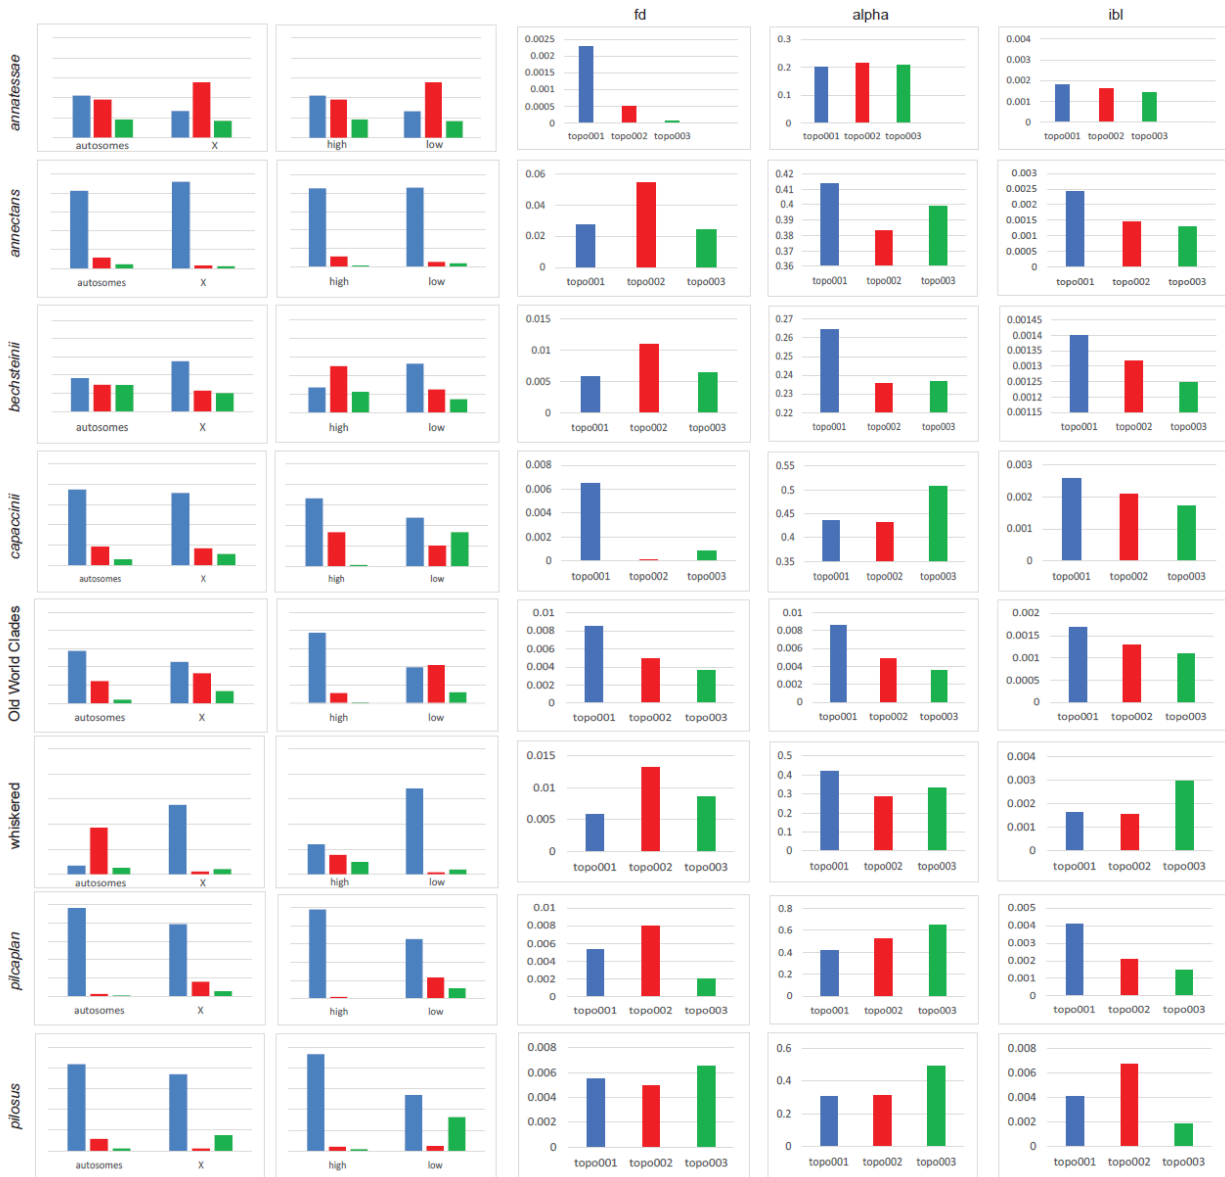

**Figure S16: Phylogenomic discordance, related to Figure 3.** Topological frequency is calculated comparing the Autosomes and X and comparing low and high recombining regions. Average values of  $f(D)$ ,  $\alpha$  and  $ibl$  per clade.

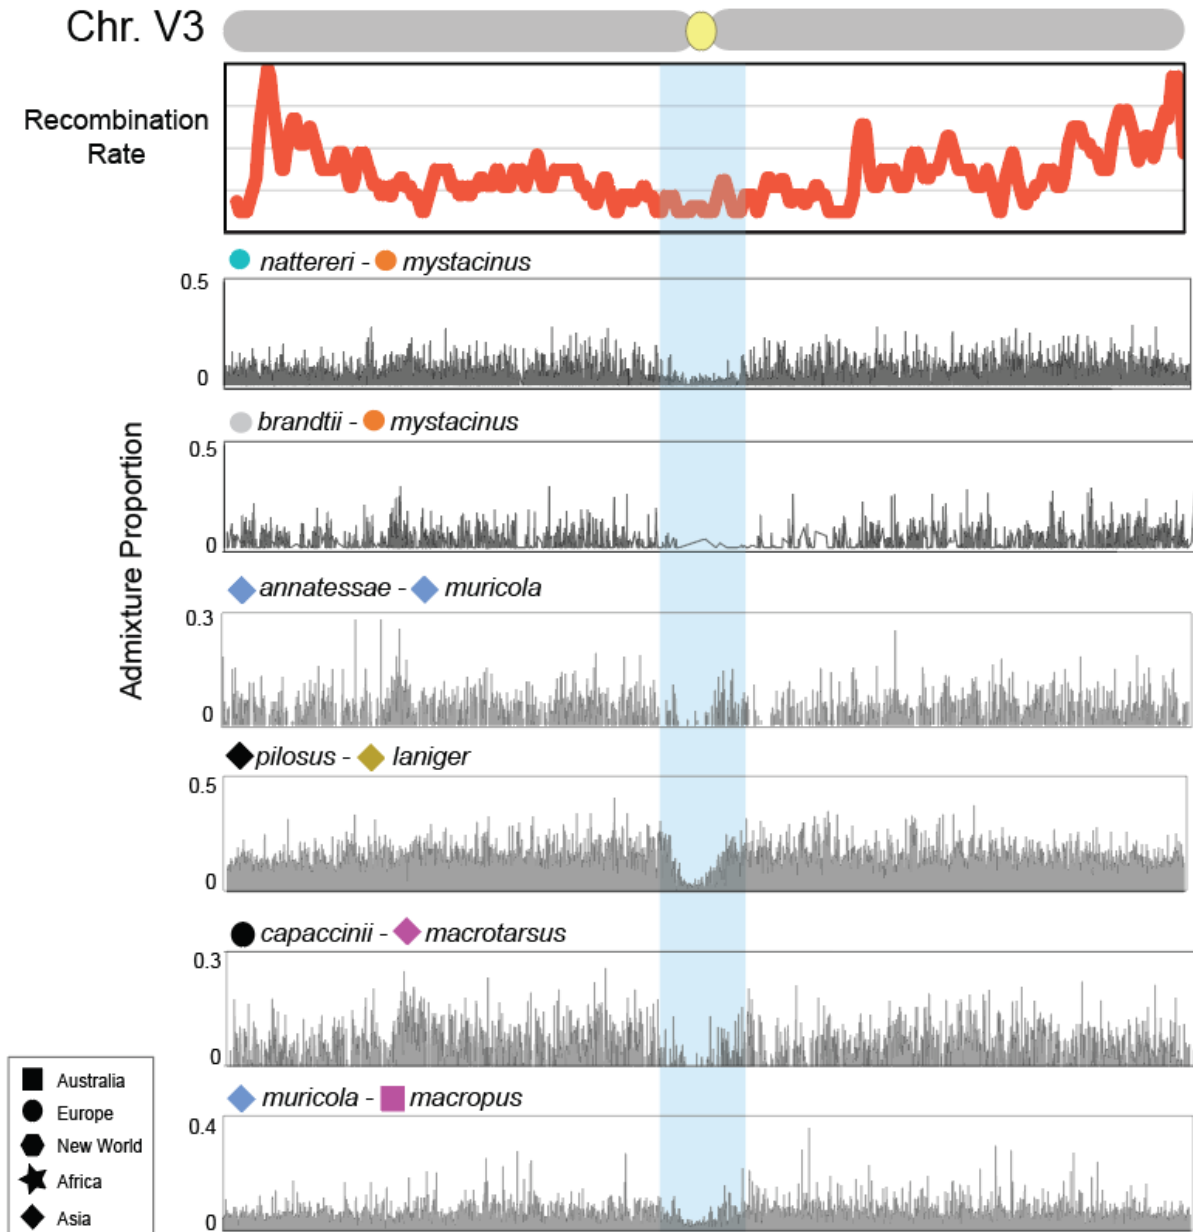

**Figure S17: The  $f(D)$  statistic calculated across chromosome V3 for various species pairs, related to Figure 4. Introgression is evident along chromosome arms while low recombining pericentromeric regions are relatively devoid of signal consistent with introgression.**

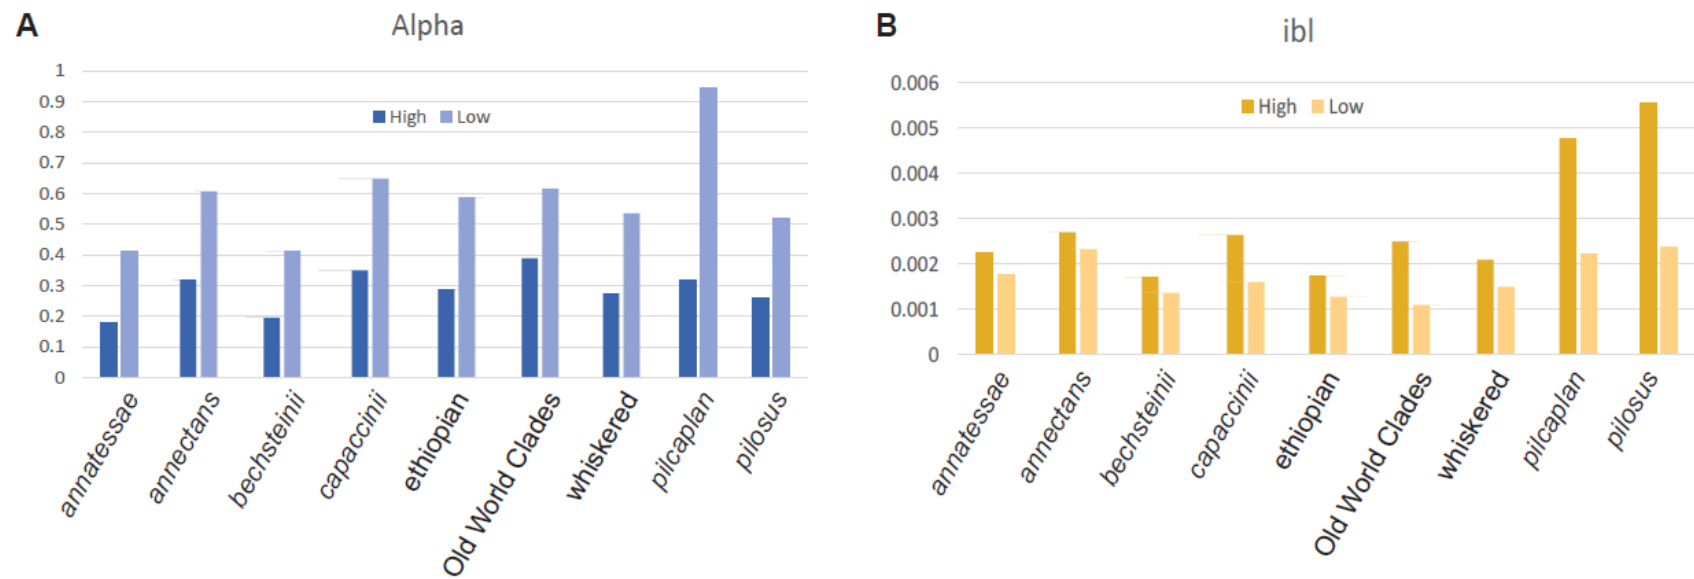

**Figure S18: Distribution of alpha and internal branch length (ibl) in regions of high and low recombination, related to Figure 4.**

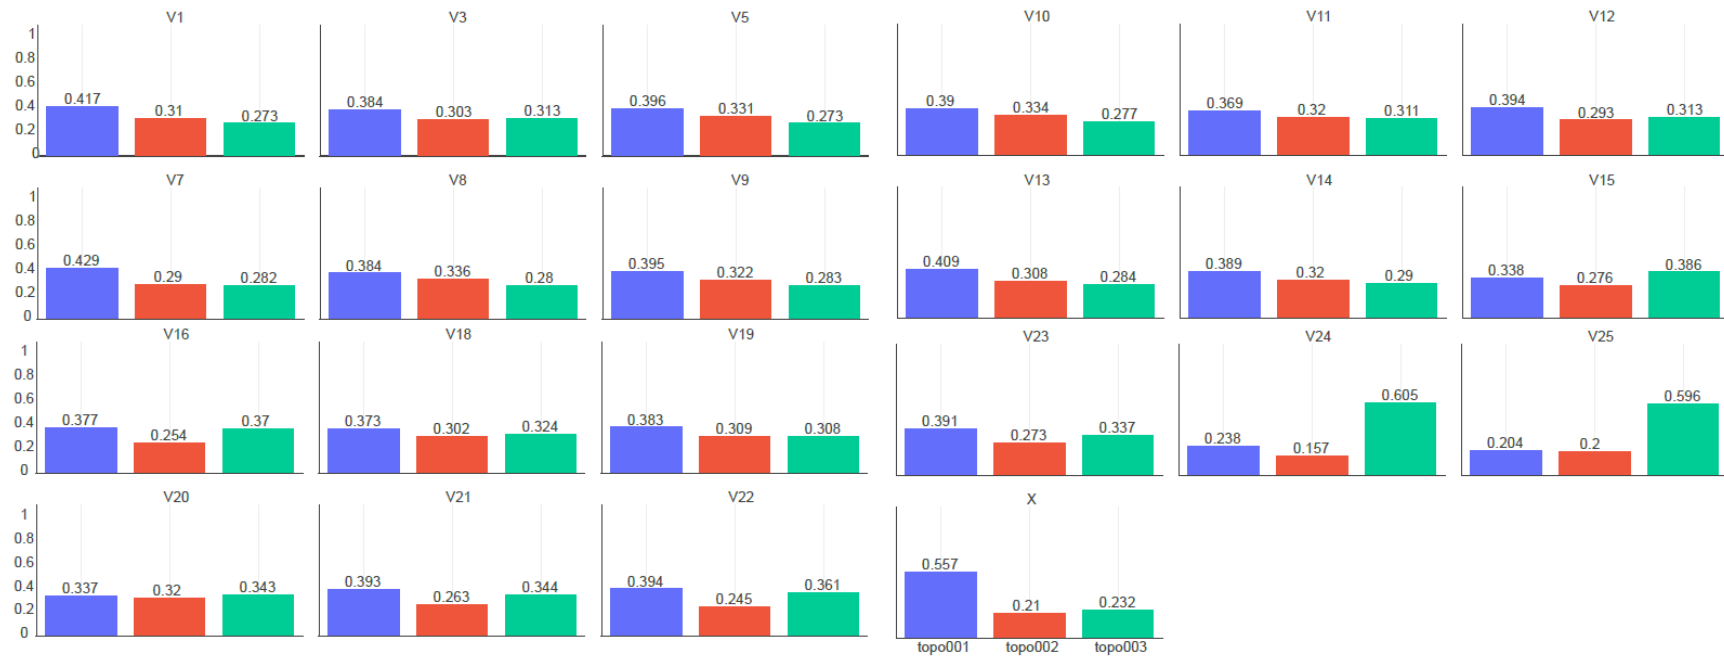

**Figure S19: Topology frequency on each chromosome representing within clad relationships among species present at swarming sites, related to Figure 5.**

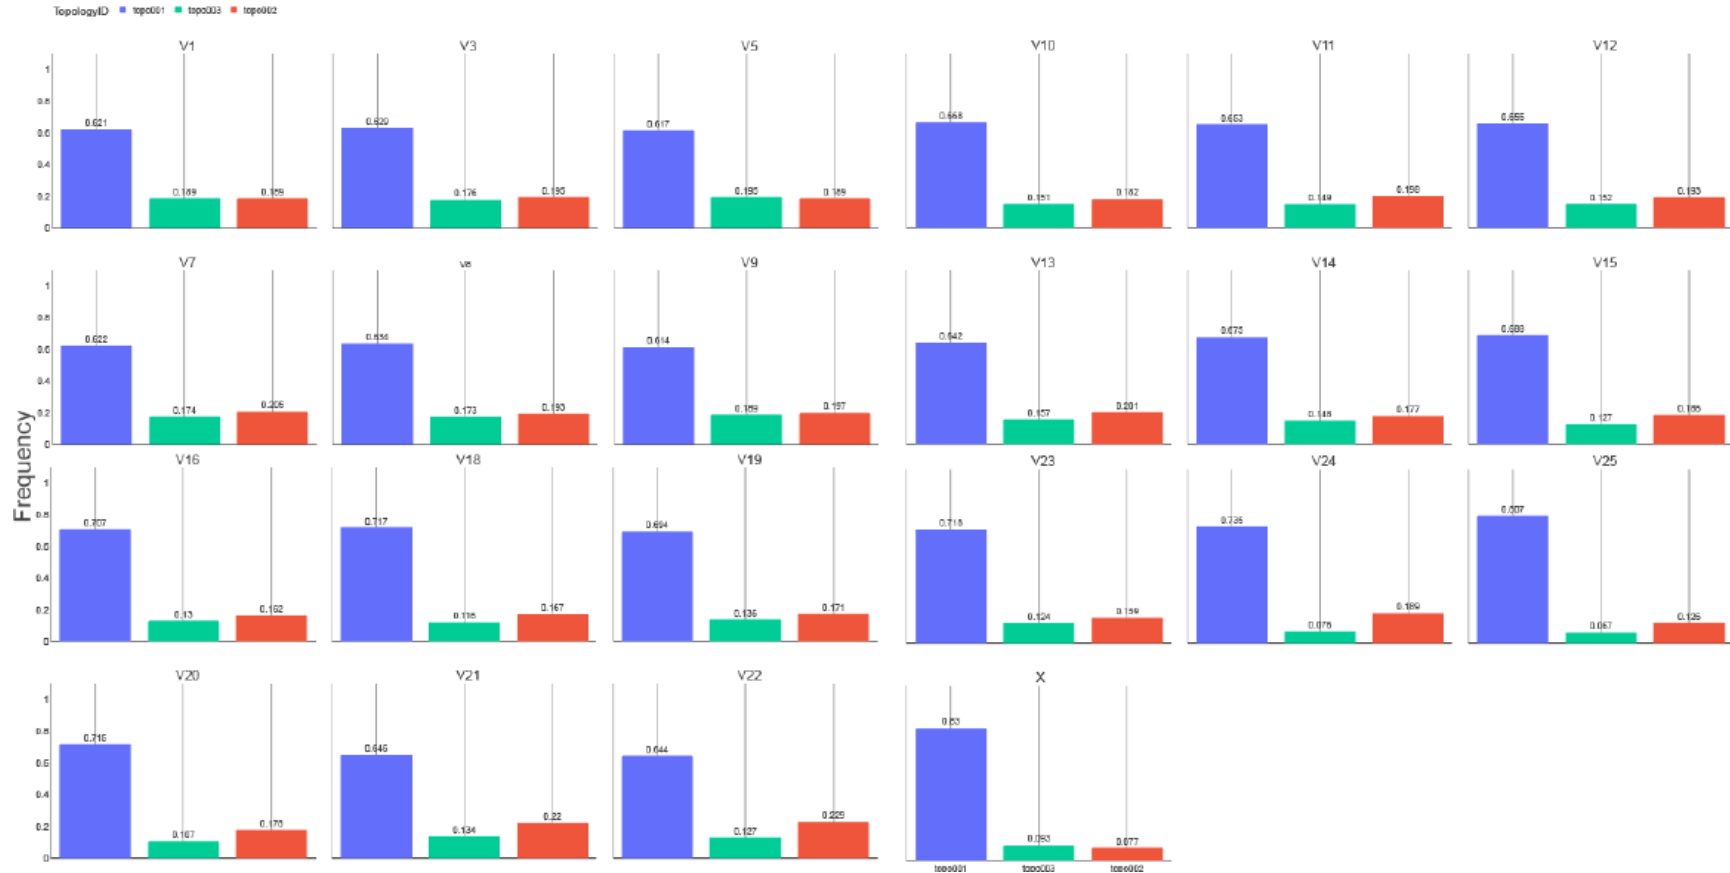

**Figure S20: Topology frequency on each chromosome representing between clad relationships for *M. brandtii*, *M. mystacinus* and *M. alcatheae* at swarming sites, related to Figure 5.**

## A Within Clade

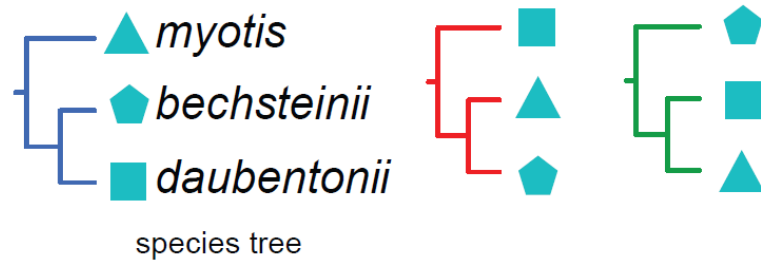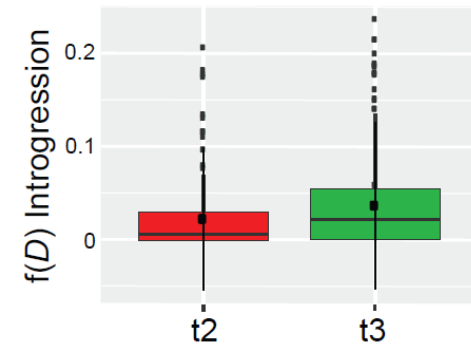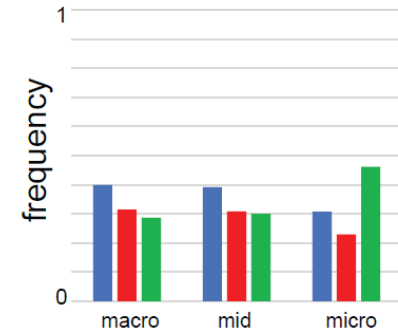

## B Between Clades

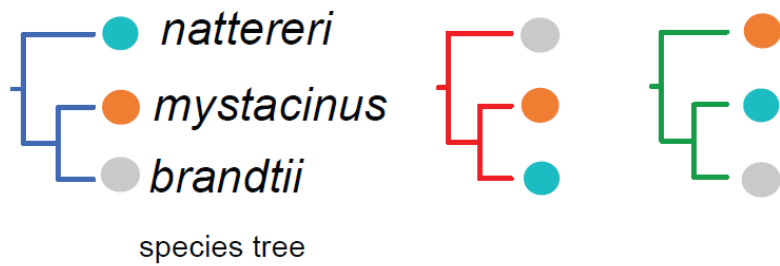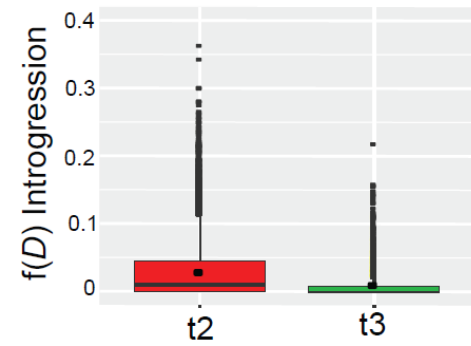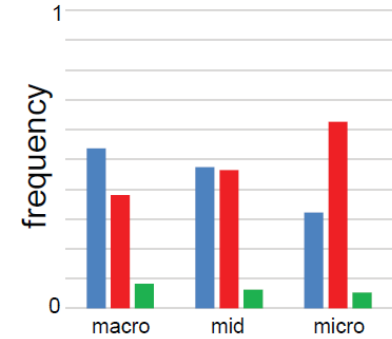

**Figure S21: Introgressed topologies with the highest  $f(D)$  values are the most enriched on microchromosomes, related to Figure 6.**

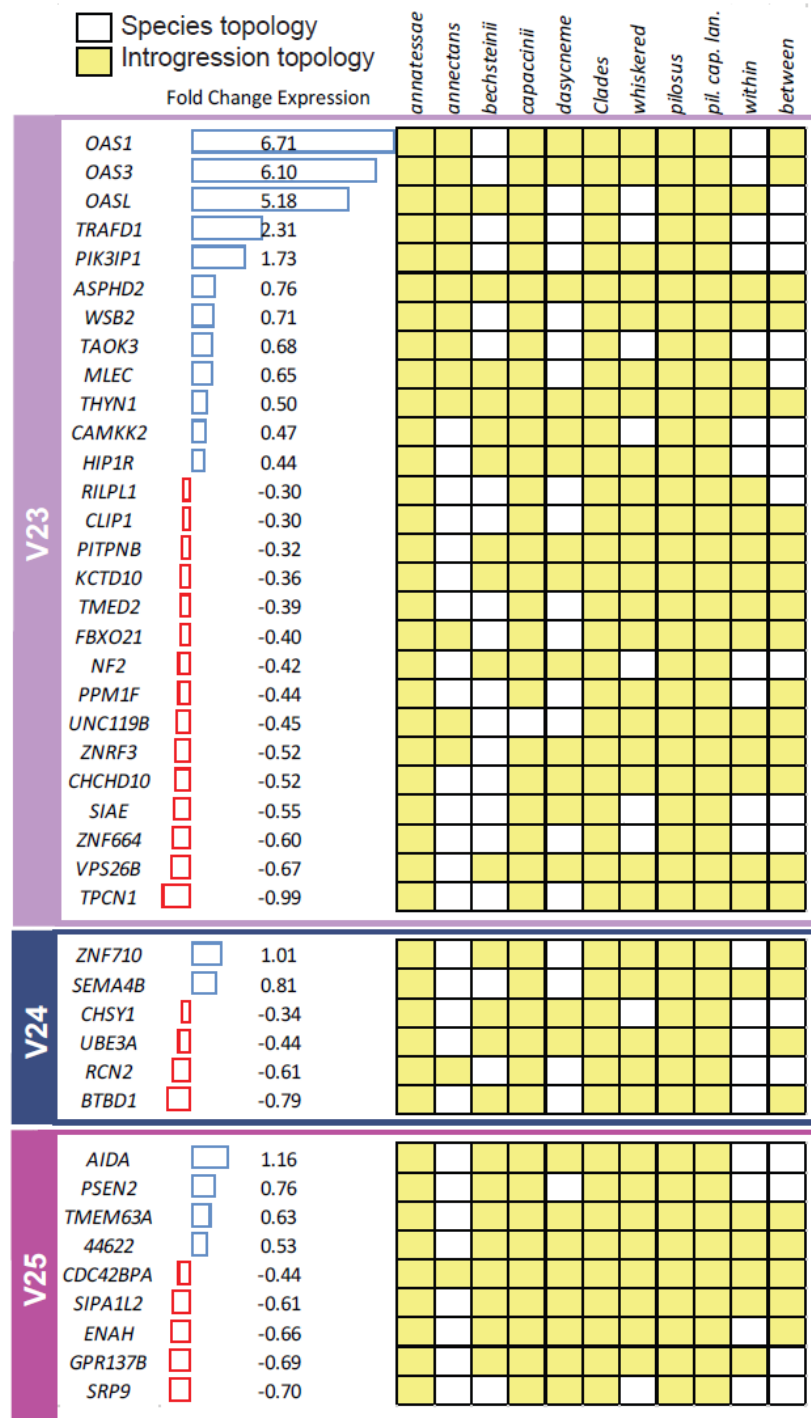

**Figure S22: Genes that are differentially expressed in response to viral challenges in *M. daubentonii* were among the most frequently introgressed across microchromosomes, related to Figure 6.**

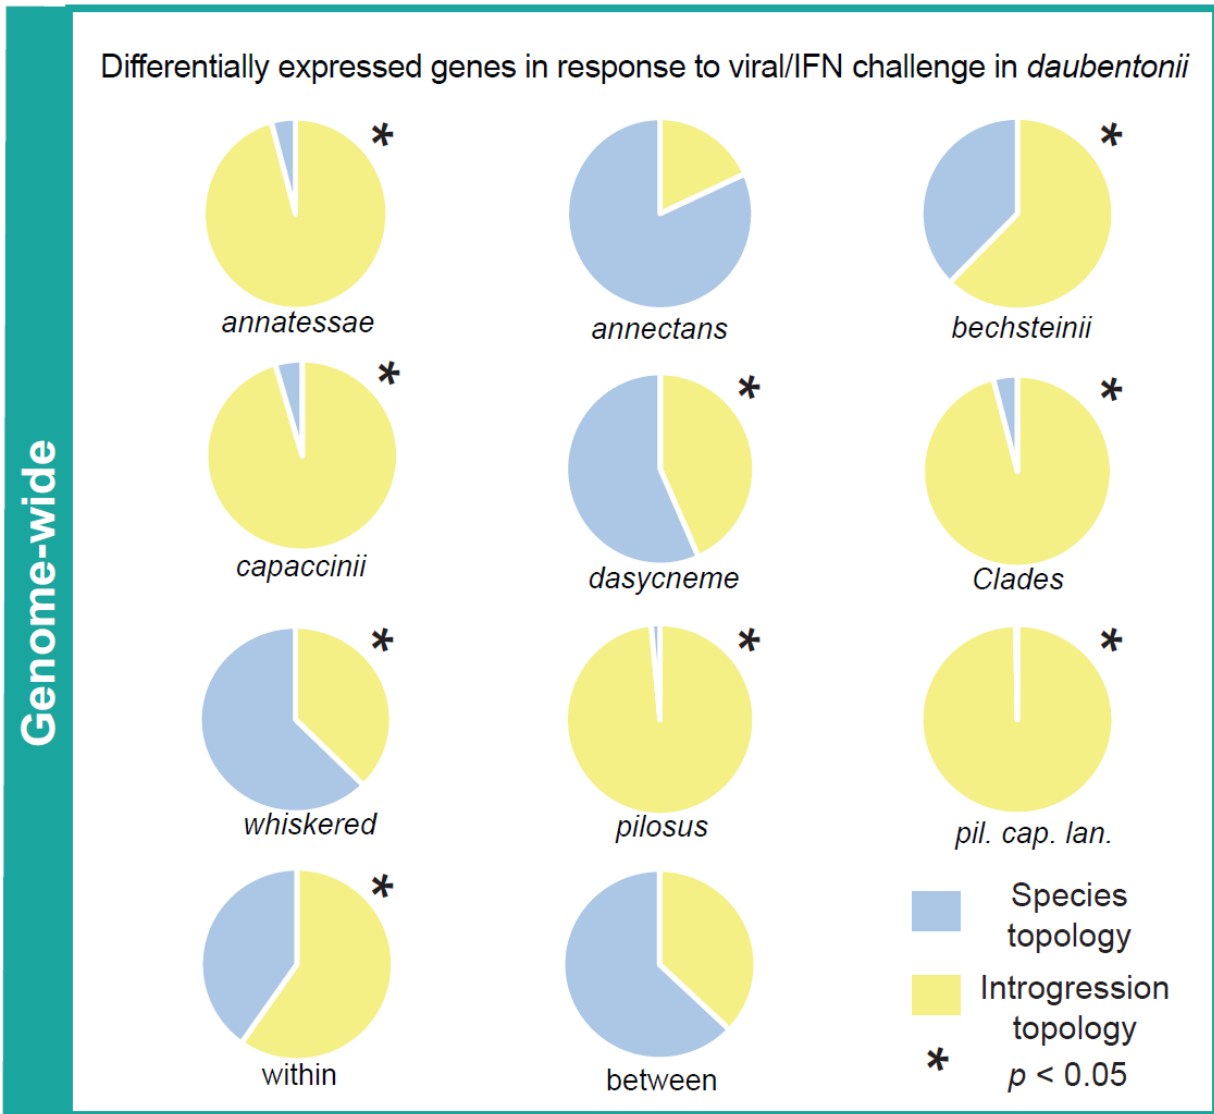

**Figure S23: Significant overlap between introgressed genomic windows and genes that are differentially expressed in response to viral challenges in *M. daubentonii*, related to Figure 6.**

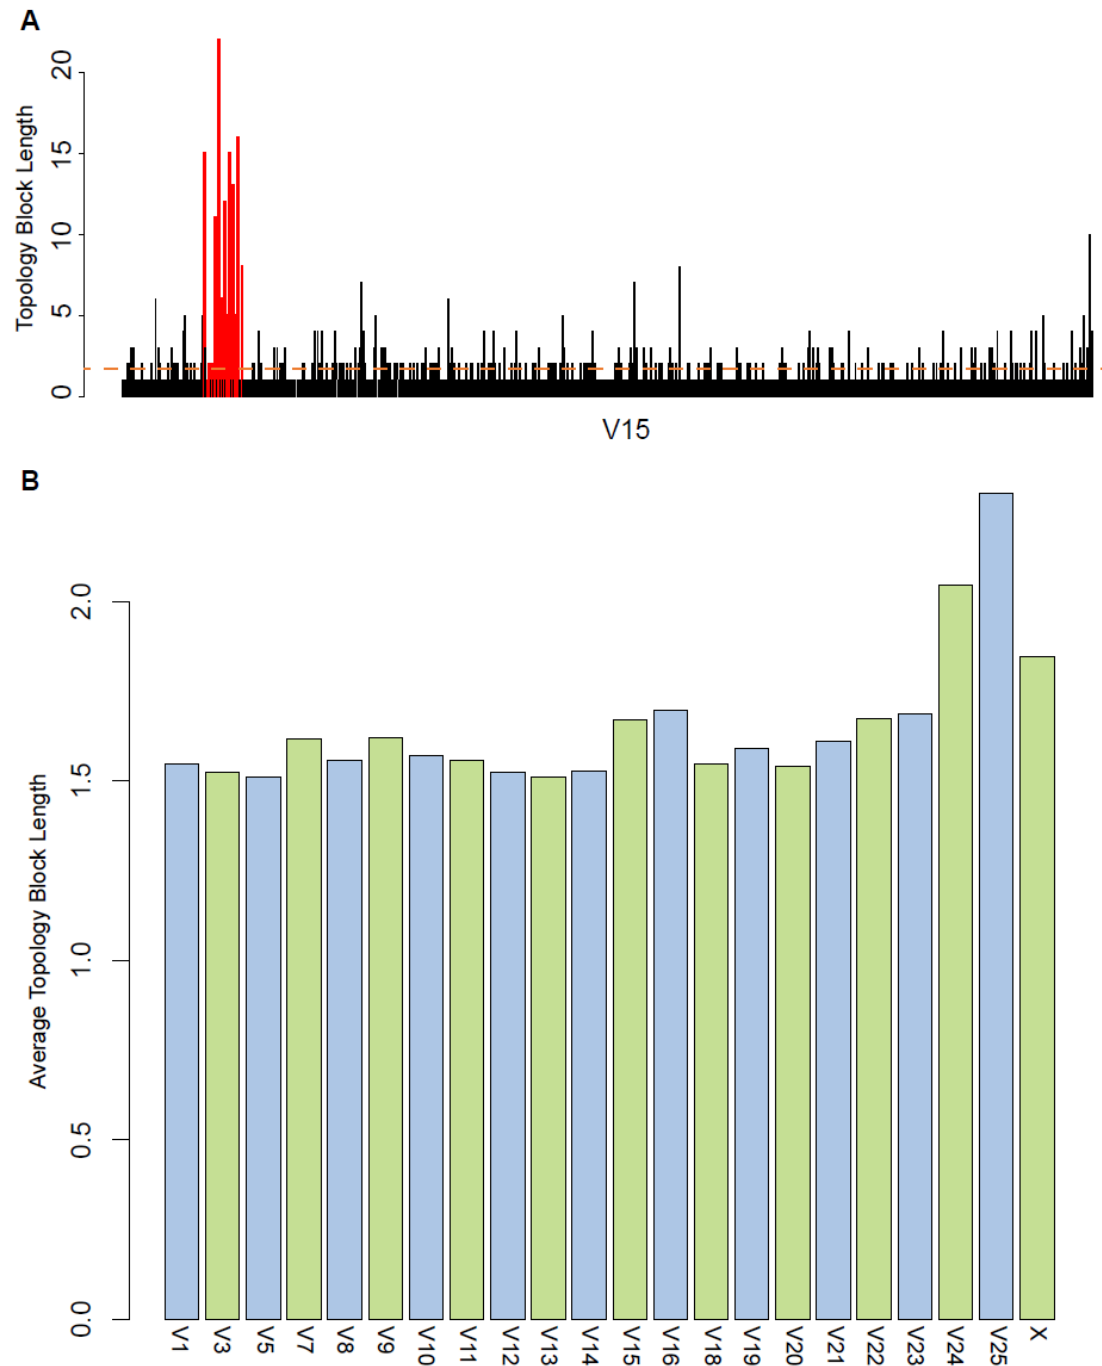

**Figure S24: Plots of topology block length (=number of consecutive identical topologies) along chromosomes for the red topology uniting *M. myotis* and *M. daubentonii*, related to Figure 6. A) shows topology block length along chromosome V15. B) Microchromosomes V24 and V25 also exhibit elevated topology block lengths.**

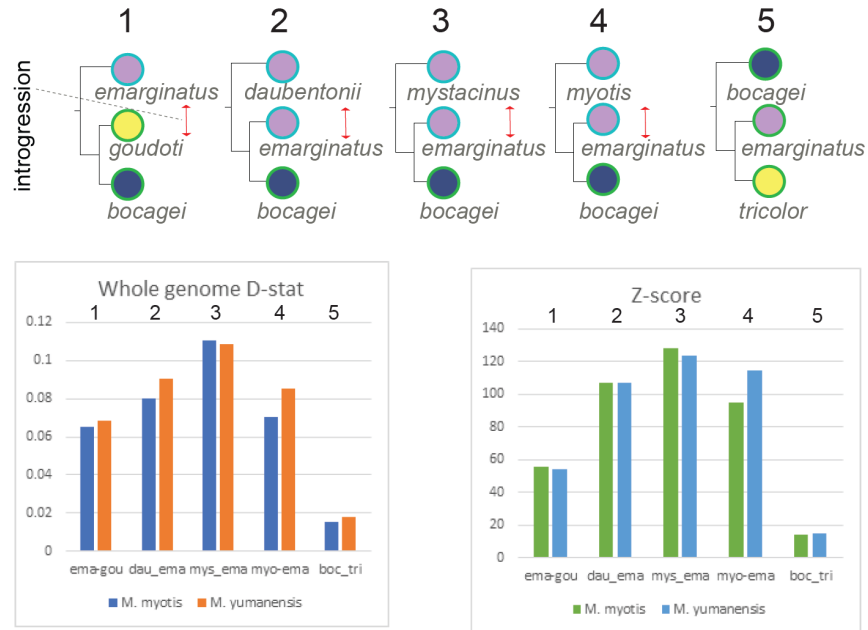

**Figure S25: No impact of reference bias on whole genome tests of introgression, related to Figures 4, 5 and 6.** *D*-statistics and Z-scores derived from data mapped to the *M. myotis* reference genome or the *M. yumanensis* genome are highly similar indicating the absence of reference bias

**Table S1: Sample Information, related to Figure 1.** Voucher or sample name, source and sampling locality for each sample used in this study. Categorization of broad scale species distributions as either tropical or temperate or spanning both. Abbreviations in sample source correspond to MHNG – Natural History Museum of Geneva, FMNH – Field Museum of Natural History Chicago, ZMMU – Zoological Museum Moscow Lomonosov State University, ROM – Royal Ontario Museum, EBD – Estacion Biologica de Doñana, AGS – Antonio Guillen-Servant, CMF – Charles M. Francis, SJP – Sebastien J. Puechmaille, MR – Manuel Ruedi

| Voucher or Sample Name | Species              | Sequencing Sample Number | Source               | Locality         | Clade     |
|------------------------|----------------------|--------------------------|----------------------|------------------|-----------|
| M2148                  | <i>latirostris</i>   | S27                      | MHNG 1998.057        | Taiwan.          |           |
| unknown                | <i>spp.</i>          | S37                      | MR                   |                  | New World |
| M941                   | <i>alcathoe</i>      | S26                      | MHNG 1828.073        | Switzerland.     | whiskered |
| M1575                  | <i>alcathoe</i>      | S49                      | MHNG 1970.099        | France.          | whiskered |
| M803                   | <i>davidii</i>       | S5                       | MHNG 1807.035        | Greece           | whiskered |
| M1993                  | <i>mystacinus</i>    | S20                      | MHNG 1991.045        | Switzerland.     | whiskered |
| FMNH151200             | <i>bocagei</i>       | S42                      | FMNH                 | Tanzania         | ethiopian |
| MZ004                  | <i>bocagei</i>       | S37                      | MHNG 1971.027        | Mozambique.      | ethiopian |
| FMNH172095             | <i>goudoti</i>       | S45                      | MR/ FMNH             | Madagascar.      | ethiopian |
| FMNH173041             | <i>goudoti</i>       | S51                      | MR/ FMNH             | Madagascar.      | ethiopian |
| TM39421                | <i>welwitschii</i>   | S23                      | MR/ Transvaal Museum | South Africa.    | ethiopian |
| FMNH144313             | <i>welwitschii</i>   | S47                      | MR/ FMNH             | Uganda.          | ethiopian |
| M733                   | <i>emarginatus</i>   | S13                      | MHNG 1807.040        | Greece.          | ethiopian |
| MZ425                  | <i>tricolor</i>      | S8                       | MHNG 1971.030        | Mozambique.      | ethiopian |
| TM40300                | <i>tricolor</i>      | S32                      | MR/ Transvaal Museum | South Africa.    | ethiopian |
| Mdas1                  | <i>dasycneme</i>     | S22                      | MHNG 1805.052        | The Netherlands. | ethiopian |
| M1606                  | <i>laniger</i>       | S57                      | MHNG 1981.074        | India.           | asian     |
| AG 950116.6            | <i>cflaniger</i>     | S19                      | AG/ SMF 86179        | Laos.            | asian     |
| M629                   | <i>laniger</i>       | S50                      | MR                   | Taiwan.          | asian     |
| M1637                  | <i>siligorensis</i>  | S31                      | MHNG 1981.073        | India.           | asian     |
| N194                   | <i>alticraniatus</i> | S41                      | MHNG 1956.089        | Laos.            | asian     |
| S175154                | <i>phanluongi</i>    | S24                      | MR/ ZMMU             |                  | asian     |
| CMF960418.17           | <i>pilosus</i>       | S10                      | CMF                  | Laos.            | asian     |
| M2065                  | <i>pilosus</i>       | S56                      | MR                   | India.           | asian     |
| CMF960522.46           | <i>macrotarsus</i>   | S20                      | CMF                  | Borneo.          | oriental  |
| EAR122                 | <i>macrotarsus</i>   | S44                      | MR                   | Philippines.     | oriental  |
| M                      | <i>macropus</i>      | S55                      | MR                   | Australia.       | oriental  |
| CMF960523.40           | <i>horsfieldii</i>   | S12                      | CMF                  | Borneo.          | oriental  |

| Voucher or Sample Name | Species                       | Sequencing Sample Number | Source          | Locality     | Clade                        |
|------------------------|-------------------------------|--------------------------|-----------------|--------------|------------------------------|
| M1551                  | <i>horsfieldii</i>            | S28                      | MHNG 1970.049   | Malaysia.    | oriental                     |
| M1184                  | <i>horsfieldii</i>            | S2                       | MHNG 1926.038   | Laos.        | oriental                     |
| LRH3168                | <i>browni</i>                 | S39                      | MR              | Philippines. | oriental                     |
| Mca1                   | <i>capaccinii</i>             | S34                      | MHNG 1805.050   | Italy.       | oriental                     |
| AGS980326.44           | <i>montivagus</i>             | S11                      | AGS             | Laos.        | muricola                     |
| M1208                  | <i>indochinensis</i>          | S17                      | MHNG 1926.043   | Laos.        | muricola                     |
| CMF960408.3            | <i>federatus</i>              | S29                      | CMF/ROM 106389  | Laos.        | muricola                     |
| M1200                  | <i>annatessae</i>             | S7                       | MHNG 1926.044   | Laos.        | muricola                     |
| M1165                  | <i>ater</i>                   | S9                       | MHNG 1926.036   | Laos.        | muricola                     |
| M1569                  | <i>muricola</i>               | S30                      | MHNG 1970.064   | Malaysia.    | muricola                     |
| M1600                  | <i>muricola</i>               | S40                      | MHNG 1972.084   | Indonesia.   | muricola                     |
| M2152                  | <i>secundus</i>               | S25                      | MHNG 1998.058   | Taiwan.      | muricola                     |
| CMF960406.5            | <i>annectans</i>              | S35                      | CMF/ ROM 106376 | Laos         | muricola                     |
| M2139                  | <i>frater</i>                 | S21                      | MHNG 1998.053   | Taiwan.      | Large <i>Myotis</i> & others |
| M2163                  | <i>soror</i>                  | S15                      | MHNG 1998.05    | Taiwan.      | Large <i>Myotis</i> & others |
| M2009                  | <i>bechsteinii</i>            | S18                      | MHNG 1991.067   | Switzerland. | Large <i>Myotis</i> & others |
| M2187                  | <i>daubentonii</i>            | S24                      | MHNG 1999.098   | Switzerland. | Large <i>Myotis</i> & others |
| M301                   | <i>daubentonii nathalinae</i> | S54                      | MR              | Spain        | Large <i>Myotis</i> & others |
| M303                   | <i>daubentonii nathalinae</i> | S52                      | MR              | Spain.       | Large <i>Myotis</i> & others |
| EBD25765               | <i>escalerai</i>              | S36                      | EBD             | Spain        | Large <i>Myotis</i> & others |
| M2096                  | <i>crypticus</i>              | S38                      | MHNG 1996.094   | Switzerland. | Large <i>Myotis</i> & others |
| M764                   | <i>nattereri</i>              | S33                      | MHNG 1807.049   | Greece.      | Large <i>Myotis</i> & others |
| MM4SA                  | <i>punicus</i>                | S1                       | MHNG 1805.092   | Italy.       | Large <i>Myotis</i> & others |
| Mb203                  | <i>blythii</i>                | S3                       | MHNG 1805.026   | Kyrgyzstan.  | Large <i>Myotis</i> & others |
| 631D                   | <i>blythii</i>                | S14                      | MHNG 1805.037   | Switzerland. | Large <i>Myotis</i> & others |
| M867                   | <i>blythii</i>                | S6                       | MHNG 1807.099   | Greece.      | Large <i>Myotis</i> & others |
| Mb3                    | <i>blythii</i>                | S4                       | MHNG 1805.041   | Spain.       | Large <i>Myotis</i> & others |
| SP.C.47                | <i>blythii</i>                | S43                      | SJP             | Iran         | Large <i>Myotis</i> & others |
| SP.C.48                | <i>blythii</i>                | S48                      | SJP             | Iran         | Large <i>Myotis</i> & others |
| Mchin1                 | <i>ancilla</i>                | S53                      | MR              | China        | Large <i>Myotis</i> & others |

**Table S2: Mapping Statistics, related to Figure 1.**

| Voucher or Sample Name | Species              | Sequencing Sample Number | % Reference Covered | reads mapped | mean coverage |
|------------------------|----------------------|--------------------------|---------------------|--------------|---------------|
| <b>M2148</b>           | <i>latirostris</i>   | S27                      | 78.6                | 94.56%       | 25            |
| <b>unknown</b>         | <i>spp.</i>          | S37                      | 79.6                | 96.33%       | 12            |
| <b>M941</b>            | <i>alcathoe</i>      | S26                      | 82.1                | 97.68%       | 16            |
| <b>M1575</b>           | <i>alcathoe</i>      | S49                      | 84.4                | 97.44%       | 26            |
| <b>M803</b>            | <i>davidii</i>       | S5                       | 85                  | 98.51%       | 23            |
| <b>M1993</b>           | <i>mystacinus</i>    | S20                      | 84.8                | 96.86%       | 22            |
| <b>FMNH144313</b>      | <i>welwitschii</i>   | S47                      | 83.1                | 95.94%       | 18            |
| <b>MZ004</b>           | <i>bocagei</i>       | S37                      | 84.8                | 97.17%       | 29            |
| <b>FMNH172095</b>      | <i>goudoti</i>       | S45                      | 81.5                | 95.22%       | 12            |
| <b>FMNH173041</b>      | <i>goudoti</i>       | S51                      | 84.8                | 96.80%       | 19            |
| <b>TM39421</b>         | <i>welwitschii</i>   | S23                      | 83.3                | 97.77%       | 17            |
| <b>FMNH151200</b>      | <i>bocagei</i>       | S42                      | 84                  | 95.01%       | 19            |
| <b>M733</b>            | <i>emarginatus</i>   | S13                      | 86.1                | 98.32%       | 25            |
| <b>MZ425</b>           | <i>tricolor</i>      | S8                       | 85.4                | 97.52%       | 21            |
| <b>TM40300</b>         | <i>tricolor</i>      | S32                      | 86.2                | 98.11%       | 27            |
| <b>Mdas1</b>           | <i>dasyncneme</i>    | S22                      | 79.5                | 98.70%       | 20            |
| <b>M1606</b>           | <i>laniger</i>       | S57                      | 85                  | 98.78%       | 18            |
| <b>AG950116.6</b>      | <i>laniger</i>       | S19                      | 85.6                | 97.27%       | 23            |
| <b>M629</b>            | <i>laniger</i>       | S50                      | 85.8                | 98.33%       | 26            |
| <b>M1637</b>           | <i>siligorensis</i>  | S31                      | 84.8                | 97.39%       | 18            |
| <b>N194</b>            | <i>alticraniatus</i> | S41                      | 86.6                | 98.29%       | 29            |
| <b>S175154</b>         | <i>phanluongi</i>    | S24                      | 81.3                | 97.45%       | 16            |
| <b>CMF960418.17</b>    | <i>pilosus</i>       | S10                      | 85.9                | 98.56%       | 24            |
| <b>M2065</b>           | <i>pilosus</i>       | S56                      | 86.1                | 98.68%       | 27            |
| <b>CMF960522.46</b>    | <i>macrotarsus</i>   | S20                      | 83                  | 97.69%       | 14            |
| <b>EAR122</b>          | <i>macrotarsus</i>   | S44                      | 83.8                | 96.5%        | 16            |
| <b>M</b>               | <i>macropus</i>      | S55                      | 84.5                | 98.84%       | 20            |
| <b>CMF960523.40</b>    | <i>horsfieldii</i>   | S12                      | 86.1                | 97.91%       | 25            |

| Voucher or Sample Name | Species                       | Sequencing Sample Number | % Reference Covered | reads mapped | mean coverage |
|------------------------|-------------------------------|--------------------------|---------------------|--------------|---------------|
| M1551                  | <i>horsfieldii</i>            | S28                      | 83.5                | 97.01%       | 15            |
| M1184                  | <i>horsfieldii</i>            | S2                       | 86.6                | 98.16%       | 28            |
| LRH3168                | <i>browni</i>                 | S39                      | 83.9                | 96.62%       | 19            |
| Mca1                   | <i>capaccinii</i>             | S34                      | 82.2                | 97.98%       | 13            |
| AGS980326.44           | <i>montivagus</i>             | S11                      | 85.2                | 97.63%       | 24            |
| M1208                  | <i>indochinensis</i>          | S17                      | 85.4                | 97.06%       | 25            |
| CMF960408.3            | <i>federatus</i>              | S29                      | 85.7                | 97.62%       | 27            |
| M1200                  | <i>annatessae</i>             | S7                       | 85.1                | 98.17%       | 20            |
| M1165                  | <i>ater</i>                   | S9                       | 85.9                | 98.04%       | 29            |
| M1569                  | <i>muricola</i>               | S30                      | 84.9                | 96.57%       | 23            |
| M1600                  | <i>muricola</i>               | S40                      | 84.6                | 94.99%       | 20            |
| M2152                  | <i>secundus</i>               | S25                      | 86.7                | 96.75%       | 27            |
| CMF960406.5            | <i>annectans</i>              | S35                      | 82.4                | 97.80%       | 12            |
| M2139                  | <i>frater</i>                 | S21                      | 86.5                | 96.04%       | 20            |
| M2163                  | <i>soror</i>                  | S15                      | 86.4                | 97.90%       | 17            |
| M2009                  | <i>bechsteinii</i>            | S18                      | 89.5                | 98.97%       | 27            |
| M2187                  | <i>daubentonii</i>            | S24                      | 88.6                | 98.31%       | 20            |
| M301                   | <i>daubentonii nathalinae</i> | S54                      | 88.9                | 99.01%       | 23            |
| M303                   | <i>daubentonii nathalinae</i> | S52                      | 89                  | 98.96%       | 26            |
| EBD25765               | <i>escalerai</i>              | S36                      | 90.5                | 96.94%       | 23            |
| M2096                  | <i>crypticus</i>              | S38                      | 91.4                | 98.30%       | 28            |
| M764                   | <i>nattereri</i>              | S33                      | 90.9                | 98.23%       | 24            |
| MM4SA                  | <i>punicus</i>                | S1                       | 94.1                | 99.18%       | 20            |
| Mb203                  | <i>blythii</i>                | S3                       | 94.1                | 98.86%       | 23            |
| 631D                   | <i>blythii</i>                | S14                      | 94.2                | 98.71%       | 24            |
| M867                   | <i>blythii</i>                | S6                       | 93.5                | 99.35%       | 18            |
| Mb3                    | <i>blythii</i>                | S4                       | 94.2                | 99.11%       | 22            |
| SP.C.47                | <i>blythii</i>                | S43                      | 93.3                | 98.64%       | 17            |
| SP.C.48                | <i>blythii</i>                | S48                      | 89.2                | 99.34%       | 17            |
| Mchin1                 | <i>ancilla</i>                | S53                      | 93.1                | 98.44%       | 25            |

**Table S3: Quast summary of difference between the original *Myotis myotis* assembly (HLmyoMyo6) and the improved assembly (Myotismyotis\_assembly\_V2), related to the improved *Myotis myotis* assembly described in the main text.**

|                         | HLmyoMyo   | Myotismyotis_assembly_V2 |
|-------------------------|------------|--------------------------|
| <b># contigs</b>        | 92         | 55                       |
| <b>Largest contig</b>   | 223369599  | 228434895                |
| <b>Total Length</b>     | 2003238046 | 2003245946               |
| <b>GC%</b>              | 43.11      | 43.11                    |
| <b>N50</b>              | 94448911   | 108770286                |
| <b>N75</b>              | 74216526   | 79764552                 |
| <b>L50</b>              | 7          | 6                        |
| <b>L75</b>              | 12         | 12                       |
| <b># N's per 100kbp</b> | 1468.17    | 1468.56                  |

**Table S4: Species composition for each subclade examined in the analysis of genome-wide phylogenomic signal, related to Figure 3.**

| <i>annatessae</i>     | <i>annectans</i>     | <i>bechsteinii</i>     | <i>capaccinii</i>        | <i>ethiopian</i>       | Old World Clades       | <i>whiskered</i>       | <i>pilcaplan</i>      | <i>pilosus</i>         |
|-----------------------|----------------------|------------------------|--------------------------|------------------------|------------------------|------------------------|-----------------------|------------------------|
| <i>bocagei</i> S37    | <i>soror</i> S15     | <i>bocagei</i> S37     | <i>bocagei</i> S37       | <i>latirostris</i> S27 | <i>latirostris</i> S27 | <i>latirostris</i> S27 | <i>bocagei</i> S37    | <i>bocagei</i> S37     |
| <i>muricola</i> S30   | <i>frater</i> S21    | <i>bechsteinii</i> S18 | <i>capaccinii</i> S34    | <i>tricolor</i> S32    | <i>laniger</i> S19     | <i>mystacinus</i> S20  | <i>capaccinii</i> S34 | <i>macropus</i> S55    |
| <i>ater</i> S9        | <i>annectans</i> S35 | <i>daubentonii</i> S24 | <i>macropus</i> S55      | <i>welwitschii</i> S23 | <i>macropus</i> S55    | <i>alcathoe</i> S49    | <i>laniger</i> S19    | <i>macrotarsus</i> S44 |
| <i>muricola</i> S40   | <i>secundus</i> S25  | <i>ancilla</i> S53     | <i>macrotarsus</i> S20   | <i>bocagei</i> S37     | <i>macrotarsus</i> S44 | <i>brandtii</i>        | <i>pilosus</i> S56    | <i>pilosus</i> S56     |
| <i>federatus</i> S29  | <i>muricola</i> S30  | <i>myotis</i>          | <i>phanluongi</i> S24    | <i>emarginatus</i> S13 | <i>muricola</i> S30    | <i>bocagei</i> S37     |                       | <i>phanluongi</i> S24  |
| <i>montivagus</i> S11 | <i>bocagei</i> S37   | <i>soror</i> S15       | <i>alticraniatus</i> S41 | <i>dasychneme</i> S22  | <i>montivagus</i> S11  | <i>myotis</i>          |                       | <i>laniger</i> S57     |
| <i>annatessae</i> S7  |                      | <i>frater</i> S21      |                          |                        | <i>myotis</i>          |                        |                       |                        |
|                       |                      |                        |                          |                        | <i>ancilla</i> S53     |                        |                       |                        |
|                       |                      |                        |                          |                        | <i>bocagei</i> S37     |                        |                       |                        |

**Table S5: Detailed breakdown of results for genome wide *D*-statistic tests, related to Figure 4.** Trees were analyzed in the format ((H1, H2), H3,) Outgroup) where the outgroup was *S. latirostris* for all tests. A Z score above 3 is considered significant.

| <u>Reference genome</u>  | <u>H1</u>                    | <u>H2</u>              | <u>H3</u>                 | <u>nABBA</u> | <u>nBABA</u> | <u>Dstat</u> | <u>jackEst</u> | <u>SE</u> | <u>Z</u>        |
|--------------------------|------------------------------|------------------------|---------------------------|--------------|--------------|--------------|----------------|-----------|-----------------|
| <i>Myotis myotis</i>     | MZ004_bocagei_S37            | M733_emarginatus_S13   | M2187_daubentonii_S24     | 1791427      | 1511330      | 0.084807     | 0.084807       | 0.00079   | <b>107.3416</b> |
| <i>Myotis yumanensis</i> | MZ004_bocagei_S37            | M733_emarginatus_S13   | M2187_daubentonii_S24     | 1711426      | 1427716      | 0.090378     | 0.090378       | 0.000843  | <b>107.2569</b> |
| <i>Myotis myotis</i>     | MZ004_bocagei_S37            | M733_emarginatus_S13   | myo_BROAD                 | 1800187      | 1563127      | 0.070484     | 0.070484       | 0.00074   | <b>95.21591</b> |
| <i>Myotis yumanensis</i> | MZ004_bocagei_S37            | M733_emarginatus_S13   | myo_BROAD                 | 1733777      | 1460703      | 0.085483     | 0.085483       | 0.000746  | <b>114.6314</b> |
| <i>Myotis myotis</i>     | MZ004_bocagei_S37            | M733_emarginatus_S13   | M1993_mystacinus_S20      | 1627722      | 1303891      | 0.110462     | 0.110462       | 0.000861  | <b>128.308</b>  |
| <i>Myotis yumanensis</i> | MZ004_bocagei_S37            | M733_emarginatus_S13   | M1993_mystacinus_S20      | 1548282      | 1244630      | 0.108722     | 0.108722       | 0.000881  | <b>123.4457</b> |
| <i>Myotis myotis</i>     | MZ004_bocagei_S37            | fmnh172095_goudoti_S45 | M733_emarginatus_S13      | 2226221      | 1954903      | 0.064891     | 0.064891       | 0.001166  | <b>55.66637</b> |
| <i>Myotis yumanensis</i> | MZ004_bocagei_S37            | fmnh172095_goudoti_S45 | M733_emarginatus_S13      | 2135239      | 1861688      | 0.06844      | 0.06844        | 0.001266  | <b>54.08118</b> |
| <i>Myotis myotis</i>     | TM40300_tricolor_S32         | M733_emarginatus_S13   | MZ004_bocagei_S37         | 1981908      | 2042725      | -0.01511     | -0.01511       | 0.001075  | <b>-14.0531</b> |
| <i>Myotis yumanensis</i> | TM40300_tricolor_S32         | M733_emarginatus_S13   | MZ004_bocagei_S37         | 1895093      | 1963687      | -0.01778     | -0.01778       | 0.001175  | <b>-15.128</b>  |
| <i>Myotis myotis</i>     | myo_BROAD                    | M2187_daubentonii_S24  | S175154_phanluongi_S24    | 2058223      | 1844105      | 0.054869     | 0.054869       | 0.001072  | <b>51.19208</b> |
| <i>Myotis myotis</i>     | M2009_bechsteinii_S18        | M2187_daubentonii_S24  | myo_BROAD                 | 2580187      | 2536752      | 0.008488     | 0.008488       | 0.002327  | <b>3.648049</b> |
| <i>Myotis myotis</i>     | CMF960522_46_macrotarsus_S20 | M2009_bechsteinii_S18  | M1569_muricola_S30        | 2926327      | 3861014      | -0.13771     | -0.13771       | 0.001369  | <b>-100.559</b> |
| <i>Myotis myotis</i>     | M2009_bechsteinii_S18        | M2096_nattereri_S38    | Mbrandtii                 | 1202345      | 1248347      | -0.01877     | -0.01877       | 0.000794  | <b>-23.6339</b> |
| <i>Myotis myotis</i>     | M2187_daubentonii_S24        | M2096_nattereri_S38    | M1993_mystacinus_S20      | 1394982      | 1545713      | -0.05126     | -0.05126       | 0.000799  | <b>-64.1663</b> |
| <i>Myotis myotis</i>     | M1993_mystacinus_S20         | Mbrandtii              | M2096_nattereri_S38       | 2184190      | 3099853      | -0.17329     | -0.17329       | 0.002389  | <b>-72.5429</b> |
| <i>Myotis myotis</i>     | M2139_fratr_S21              | M2009_bechsteinii_S18  | CMF960406_5_annectans_S35 | 2760696      | 3263672      | -0.08349     | -0.08349       | 0.002849  | <b>-29.3023</b> |
| <i>Myotis myotis</i>     | M1993_mystacinus_S20         | M941_alcathoe_S26      | Mbrandtii                 | 2430561      | 2617513      | -0.03703     | -0.03703       | 0.001214  | <b>-30.496</b>  |

| <u>Reference genome</u> | <u>H1</u>                    | <u>H2</u>                    | <u>H3</u>                 | <u>nABBA</u>   | <u>nBABA</u>   | <u>Dstat</u>    | <u>jackEst</u>  | <u>SE</u>       | <u>Z</u>        |
|-------------------------|------------------------------|------------------------------|---------------------------|----------------|----------------|-----------------|-----------------|-----------------|-----------------|
| <i>Myotis myotis</i>    | CMF960522_46_macrotarsus_S20 | S175154_phanluongi_S24       | Mca1_capaccinii_S34       | 3473250        | 4084785        | -0.08091        | -0.08091        | 0.00315         | <b>-25.6831</b> |
| <i>Myotis myotis</i>    | M941_alcathoe_S26            | Mbrandtii                    | Mdas1_dasycneme_S22       | 2214338        | 3236368        | -0.1875         | -0.1875         | 0.00342         | <b>-54.82</b>   |
| <i>Myotis myotis</i>    | M1993_mystacinus_S20         | Mbrandtii                    | Mdas1_dasycneme_S22       | 2121574        | 3071673        | -0.18295        | -0.18295        | 0.002391        | <b>-76.5191</b> |
| <i>Myotis myotis</i>    | M733_emarginatus_S13         | Mdas1_dasycneme_S22          | M2009_bechsteinii_S18     | 2507335        | 2422351        | 0.017239        | 0.017239        | 0.001189        | <b>14.49878</b> |
| <i>Myotis myotis</i>    | M2187_daubentonii_S24        | M2096_nattereri_S38          | Mdas1_dasycneme_S22       | 1560422        | 1696782        | -0.04186        | -0.04186        | 0.000738        | <b>-56.7437</b> |
| <i>Myotis myotis</i>    | M733_emarginatus_S13         | Mdas1_dasycneme_S22          | M1993_mystacinus_S20      | 2131851        | 2029572        | 0.024578        | 0.024578        | 0.000942        | <b>26.09706</b> |
| <i>Myotis myotis</i>    | myo_BROAD                    | M733_emarginatus_S13         | M1993_mystacinus_S20      | 2532201        | 2527665        | 0.000896        | 0.000896        | 0.001001        | 0.895467        |
| <i>Myotis myotis</i>    | M2009_bechsteinii_S18        | M2187_daubentonii_S24        | M2096_nattereri_S38       | 2621507        | 2579505        | 0.008076        | 0.008076        | 0.002248        | <b>3.592021</b> |
| <i>Myotis myotis</i>    | M629_laniger_S50             | CMF960522_46_macrotarsus_S20 | M2065_pilosus_S56         | 2361436        | 7045984        | -0.49796        | -0.49796        | 0.002534        | <b>-196.503</b> |
| <i>Myotis myotis</i>    | M1569_muricola_S30           | M1208_indochinensis_S17      | M1200_annatessae_S7       | 3455060        | 3730538        | -0.03834        | -0.03834        | 0.00132         | <b>-29.0523</b> |
| <i>Myotis myotis</i>    | M2187_daubentonii_S24        | M2009_bechsteinii_S18        | myo_BROAD                 | 2536800        | 2581340        | -0.0087         | -0.0087         | 0.002334        | <b>-3.72829</b> |
| <i>Myotis myotis</i>    | M2139_framer_S21             | M2187_daubentonii_S24        | M2065_pilosus_S56         | 2650991        | 3062319        | -0.07199        | -0.07199        | 0.001695        | <b>-42.4712</b> |
| <i>Myotis myotis</i>    | M1569_muricola_S30           | M1208_indochinensis_S17      | CMF960406_5_annectans_S35 | 2093563        | 1918718        | 0.043577        | 0.043577        | 0.000709        | <b>61.43691</b> |
| <i>Myotis myotis</i>    | M2096_nattereri_S38          | M2187_daubentonii_S24        | M733_emarginatus_S13      | <b>1610340</b> | <b>1590837</b> | <b>0.006092</b> | <b>0.006092</b> | <b>0.000795</b> | <b>7.668013</b> |

**Table S6: Results of the QuIBL analysis, related to Figure 4.** The table shows the proportion of variation in discordant topologies explained by ILS alone or a combination of ILS and introgression. The difference in BIC estimates (delta) for each model indicates that the model with introgression and ILS (preferred at  $\delta \geq -10$ ) is the best fit for all relationships analyzed. Old World Clades refers to the relationship among the Muricola, Large Myotis, Asian, and Oriental clades shown in Figure 1. *pil.-cap.-lan.* refers to the relationship among *pilosus*, *capaccinii*, and *laniger*. Non-species trees are color-coded to correspond with data displayed in Figure 1.

| Clade              | non-species topology | tree                                                                              | ILS | Introgression + ILS | delta  |
|--------------------|----------------------|-----------------------------------------------------------------------------------|-----|---------------------|--------|
| <i>annatessae</i>  | topo002              | ( <i>annatessae</i> , ( <i>indochinensis</i> , <i>muricola</i> ))                 | 0%  | 100%                | -13383 |
|                    | topo001              | <i>indochinensis</i> , ( <i>muricola</i> , <i>annatessae</i> )                    | 0%  | 100%                | -17245 |
| <i>annectans</i>   | topo003              | ( <i>annectans</i> , ( <i>frater</i> , <i>muricola</i> ))                         | 0%  | 100%                | -995   |
|                    | topo002              | ( <i>frater</i> , ( <i>annectans</i> , <i>muricola</i> ))                         | 0%  | 100%                | -3319  |
| <i>bechsteinii</i> | topo002              | ( <i>bechsteinii</i> , ( <i>daubentonii</i> , <i>myotis</i> ))                    | 0%  | 100%                | -9038  |
|                    | topo003              | ( <i>daubentonii</i> , ( <i>bechsteinii</i> , <i>myotis</i> ))                    | 0%  | 100%                | -9045  |
| <i>capaccinii</i>  | topo001              | ( <i>phanluongi</i> , ( <i>capaccinii</i> , <i>macrotarsus</i> ))                 | 0%  | 100%                | -30065 |
|                    | topo002              | ( <i>macrotarsus</i> , ( <i>capaccinii</i> , <i>phanluongi</i> ))                 | 0%  | 100%                | -5825  |
| <i>dasycneme</i>   | topo004              | ( <i>mystacinus</i> , ( <i>alcathoe</i> , ( <i>dasycneme</i> , <i>bocagei</i> ))) | 0%  | 100%                | -299   |
|                    | topo002              | ( <i>bocagei</i> , ( <i>dasycneme</i> , ( <i>mystacinus</i> , <i>alcathoe</i> ))) | 0%  | 100%                | -44060 |
| Clades             | topo003              | ( <i>muricola</i> , ( <i>myotis</i> , <i>macrotarsus</i> ))                       | 0%  | 100%                | -9122  |
|                    | topo001              | ( <i>myotis</i> , ( <i>macrotarsus</i> , <i>muricola</i> ))                       | 0%  | 100%                | -17445 |
| whiskered          | topo004              | ( <i>alcathoe</i> , ( <i>mystacinus</i> , <i>brandtii</i> ))                      | 0%  | 100%                | -4761  |

|                              |         |                                                       |     |      |        |
|------------------------------|---------|-------------------------------------------------------|-----|------|--------|
|                              | topo006 | ( <i>mystacinus, alcatheae,</i><br><i>brandtii</i> )) | 0%  | 100% | -4474  |
| <i><b>pil. cap. lan.</b></i> | topo003 | ( <i>laniger,</i><br><i>capaccinii,pilosus</i> ))     | 73% | 27%  | 33     |
|                              | topo001 | <i>capaccinii, ((pilosus,</i><br><i>laniger</i> ))    | 0%  | 100% | -33039 |
| <i><b>pilosus</b></i>        | topo001 | ( <i>macropus, (pilosus,</i><br><i>laniger</i> ))     | 0%  | 100% | -32580 |
|                              | topo005 | ( <i>pilosus, (macropus,</i><br><i>laniger</i> ))     | 28% | 72%  | -174   |

**Table S7: Studies reporting species presence at swarming sites across Europe [S2-16], related to Figure 5.** Although *M. myotis* and *M. blythii* are thought to use a lekking mating behavior

| Paper                      | Schunger et al (2004) | Dundarova (2018) | Rivers et al (2006) | Parsons et al (2003) | Piksa et al (2011) | Suba et al (2008) | Schaik et al (2015) | Bogdanowicz et al 2012 | Suba et al (2011) | Glover and Altringham (2008) | Schmidbauer and Denzinger (2019) | Pocora et al (2012) | Dekeukeleire et al (2016) | Thomas and Davison (2020) | Ignaczak et al (2019) |
|----------------------------|-----------------------|------------------|---------------------|----------------------|--------------------|-------------------|---------------------|------------------------|-------------------|------------------------------|----------------------------------|---------------------|---------------------------|---------------------------|-----------------------|
| Country                    | Bulgaria              | Bulgaria         | UK                  | UK                   | Poland             | Latvia            | Netherlands         | Poland                 | Latvia            | UK                           | Germany                          | Romania             | Belgium and Netherlands   | Wales                     | Poland                |
| <i>myotis</i>              | x                     | x                |                     |                      | x                  |                   | x                   |                        |                   |                              | x                                | x                   | x                         |                           | x                     |
| <i>blythii</i>             | x                     | x                |                     |                      |                    |                   |                     |                        |                   |                              |                                  |                     |                           |                           |                       |
| <i>bechsteinii</i>         | x                     | x                |                     | x                    | x                  |                   | x                   |                        |                   |                              |                                  | x                   | x                         | x                         | x                     |
| <i>nattereri/crypticus</i> | x                     | x                | x                   | x                    | x                  | x                 |                     |                        |                   | x                            | x                                | x                   | x                         | x                         | x                     |
| <i>daubentonii</i>         | x                     | x                | x                   | x                    | x                  | x                 | x                   |                        | x                 | x                            |                                  | x                   |                           |                           | x                     |
| <i>brandtii</i>            | x                     | x                | x                   | x                    | x                  | x                 | x                   | x                      | x                 | x                            |                                  | x                   | x                         | x                         | x                     |
| <i>alcatheae</i>           | x                     | x                |                     |                      | x                  |                   |                     | x                      |                   |                              |                                  |                     |                           |                           |                       |
| <i>mystacinus</i>          |                       | x                | x                   | x                    | x                  | x                 | x                   | x                      |                   | x                            |                                  | x                   | x                         | x                         |                       |
| <i>emarginatus</i>         | x                     | x                |                     |                      |                    |                   | x                   |                        |                   |                              |                                  |                     | x                         |                           |                       |
| <i>dasycneme</i>           |                       |                  |                     |                      | x                  | x                 | x                   |                        | x                 |                              |                                  |                     | x                         |                           |                       |

**Table S8: STRING enrichment analysis for an introgressed block on V15 which unites *M. myotis* and *M. daubentonii*, related to Figure 6.** Enrichments are considered significant with an FDR value of  $\geq 0.05$ .

| Category                  | #term ID    | term description                       | observed gene count | background gene count | strength | false discovery rate |
|---------------------------|-------------|----------------------------------------|---------------------|-----------------------|----------|----------------------|
| <b>Molecular Function</b> | GO:0005149  | interleukin-1 receptor binding         | 7                   | 17                    | 2.04     | 8.6E-09              |
| <b>Molecular Function</b> | GO:0070851  | Growth factor receptor binding         | 8                   | 138                   | 1.19     | 1.2E-04              |
| <b>Molecular Function</b> | GO:0005126  | Cytokine receptor binding              | 8                   | 264                   | 0.9      | 9.0E-03              |
| <b>KEGG Pathway</b>       | hsa04060    | Cytokine-cytokine receptor interaction | 7                   | 282                   | 0.82     | 3.6E-02              |
| <b>Reactome Pathway</b>   | HSA-446652  | Interleukin-1 family signaling         | 7                   | 136                   | 1.13     | 2.4E-03              |
| <b>Reactome Pathway</b>   | HSA-9014826 | Interleukin-36 pathway                 | 3                   | 6                     | 2.12     | 4.6E-03              |

**Table S9: Immunogenetic diversification mechanisms across the Tree of Life, related to Figure 6.** Note that most of these mechanisms operate within the listed taxa. MHC allelic polymorphism has long been of interests to evolutionary biologists due to its function at the population level. Now adaptive immunogenetic introgression in *Myotis* bats appears to elevate such defense diversification strategies to the level of the multispecies community.

| Taxa               | Process                                                         | Genes Diversified                                                             | Evolutionary Facilitation                       | Mechanism                                                              |
|--------------------|-----------------------------------------------------------------|-------------------------------------------------------------------------------|-------------------------------------------------|------------------------------------------------------------------------|
| archaea/bacteria   | adaptive anti-phage immunity                                    | clustered regularly interspaced short palindromic repeats (CRISPR)            | horizontal gene transfer                        | CRISPR/cas9 [S17]                                                      |
| arthropods         | repertoire of pattern recognition receptors                     | down syndrome cell adhesion molecule (DSCAM)                                  | exon family expansion                           | mutually exclusive alternative RNA exon splicing [S18]                 |
| jawless fishes     | VLR repertoire diversification                                  | variable lymphocyte receptors                                                 | copy-choice recombination                       | APOBEC family deaminases [S19]                                         |
| jawed vertebrates  | somatic cell gene rearrangement of lymphocyte antigen receptors | immunoglobulin, T cell receptor                                               | horizontal transposon capture                   | recombination activating genes (RAG) [S20]                             |
| jawed vertebrates  | antibody affinity maturation                                    | immunoglobulin heavy and light chain variable genes                           | selection of controlled somatic hypermutation   | activation induced cytidine deaminase (AID) [S21]                      |
| Bovidae            | ultralong cattlebody knob diversification                       | third complementarity determining region (CDR3) of immunoglobulin heavy chain | bias for cysteine mutation, truncations in CDR3 | activation induced cytidine deaminase (AID) [S22]                      |
| jawed vertebrates  | allelic polymorphism                                            | classical MHC antigen presentation                                            | balancing selection, pathogen co-evolution      | extreme allelic diversity in peptide binding – <b>Population</b> [S23] |
| <i>Myotis</i> bats | tunable immunogenetic viral tolerance                           | interferons, antigen processing, anti-viral signaling                         | swarming, interspecific hybridization           | adaptive immunogenetic introgression – <b>Genus Community</b>          |

### Supplementary References

- S1. Jebb, D., Huang, Z., Pippel, M., Hughes, G.M., Lavrichenko, K., Devanna, P., Winkler, S., Jermini, L.S., Skirmuntt, E.C., Katzourakis, A., et al. (2020). Six reference-quality genomes reveal evolution of bat adaptations. *Nature* 583, 578–584.
- S2. Schunger, I., Dietz, C., Merdschanova, D., Merdschanov, S., Christov, K., Borissov, I., Staneva, S., and Petrov, B. (2004). Swarming of bats (Chiroptera, Mammalia) in the Vodnita Dupki cave (Central Balkan National Park, Bulgaria). *Acta Zool.* 56, 323–330.
- S3. Dundarova, H. (2018). Bat diversity in Lednitsata and Forgovskata dupka Caves: two potentially important swarming sites in Western Rhodopes Mts., Bulgaria. *Acta Zool. Bulg.* 70, 139–142.
- S4. Rivers, N.M., and Butlin R. K. Altringham, J.D. (2006). Autumn swarming behaviour of Natterer's bats in the UK: population size, catchment area and dispersal. *Biol. Conserv.* 127, 215–226.
- S5. Parsons, K.N., Jones, G., and Greenaway, F. (2003). Swarming activity of temperate zone microchiropteran bats: effects of season, time of night and weather conditions. *J. Zool.* 261, 257–264.
- S6. Piksa, K., Bogdanowicz, W., and Tereba, A. (2011). Swarming of Bats at Different Elevations in the Carpathian Mountains. *Acta Chiropterologica* 13, 113–122.
- S7. Šuba, J., Vintulis, V., and Pētersons, G. (2008). Late summer and autumn swarming of bats at Sikspārņu caves in Gauja National Park. *Acta Univ. Latv* 745, 43–52.
- S8. van Schaik, J., Janssen, R., Bosch, T., Haarsma, A.-J., Dekker, J.J.A., and Kranstauber, B. (2015). Bats Swarm Where They Hibernates: Compositional Similarity between Autumn Swarming and Winter Hibernation Assemblages at Five Underground Sites. *PLoS One* 10, e0130850.
- S9. Bogdanowicz, W., Piksa, K., and Tereba, A. (2012). Hybridization hotspots at bat swarming sites. *PLoS One* 7, e53334.
- S10. Suba, J., Vintulis, V., and Petersons, G. (2010). Body weight provides insights into the feeding strategy of swarming bats. *Hystrix, the Italian* 22, 1.
- S11. Glover, A.M., and Altringham, J.D. (2008). Cave selection and use by swarming bat species. *Biol. Conserv.* 141, 1493–1504.
- S12. Schmidbauer, P., and Denzinger, A. (2019). Social calls of *Myotis nattereri* during swarming: Call structure mirrors the different behavioral context. *PLoS One* 14, e0221792.
- S13. Pocora, I., Pocora, V., and Baltag, E. (2012). Swarming activity of bats at the entrance of Liliecilor cave from Rarău Mountains. *Analele Științifice ale* 58, 151–158.

- S14. Dekeukeleire, D., Janssen, R., Haarsma, A.-J., Bosch, T., and Van Schaik, J. (2016). Swarming behaviour, catchment area and seasonal movement patterns of the Bechstein's bats: implications for conservation. *Acta Chiropt.* 18, 349–358.
- S15. Ignaczak, M., Postawa, T., Lesiński, G., and Gottfried, I. (2019). The role of autumnal swarming behaviour and ambient air temperature in the variation of body mass in temperate bat species. *Hystrix* 30, 65–73.
- S16. Thomas, R.J., and Davison, S.P. (2022). Seasonal swarming behavior of *Myotis* bats revealed by integrated monitoring, involving passive acoustic monitoring with automated analysis, trapping, and video monitoring. *Ecol. Evol.* 12, e9344.
- S17. Jinek, M., Chylinski, K., Fonfara, I., Hauer, M., Doudna, J.A., and Charpentier, E. (2012). A Programmable Dual-RNA–Guided DNA Endonuclease in Adaptive Bacterial Immunity. *Science* 337, 816–821.
- S18. Watson, F.L., Püttmann-Holgado, R., Thomas, F., Lamar, D.L., Hughes, M., Kondo, M., Rebel, V.I., and Schmucker, D. (2005). Extensive diversity of Ig-superfamily proteins in the immune system of insects. *Science* 309, 1874–1878.
- S19. Pancer, Z., Amemiya, C.T., Ehrhardt, G.R.A., Ceitlin, J., Gartland, G.L., and Cooper, M.D. (2004). Somatic diversification of variable lymphocyte receptors in the agnathan sea lamprey. *Nature* 430, 174–180.
- S20. Hozumi, N., and Tonegawa, S. (1976). Evidence for somatic rearrangement of immunoglobulin genes coding for variable and constant regions. *Proc. Natl. Acad. Sci. U. S. A.* 73, 3628–3632.
- S21. Muramatsu, M., Kinoshita, K., Fagarasan, S., Yamada, S., Shinkai, Y., and Honjo, T. (2000). Class switch recombination and hypermutation require activation-induced cytidine deaminase (*AID*), a potential RNA editing enzyme. *Cell* 102, 553–563.
- S22. Wang, F., Ekiert, D.C., Ahmad, I., Yu, W., Zhang, Y., Bazirgan, O., Torkamani, A., Raudsepp, T., Mwangi, W., Criscitiello, M.F., et al. (2013). Reshaping antibody diversity. *Cell* 153, 1379–1393.
- S23. Zinkernagel, R.M., and Doherty, P.C. (1974). Restriction of in vitro T cell-mediated cytotoxicity in lymphocytic choriomeningitis within a syngeneic or semiallogeneic system. *Nature* 248, 701–702.
